# Supplementary material
Source: PubMed Central journal article supplement (PMC4015685)
Supplement: pr5000472_si_001.pdf [file pr5000472_si_001.pdf]

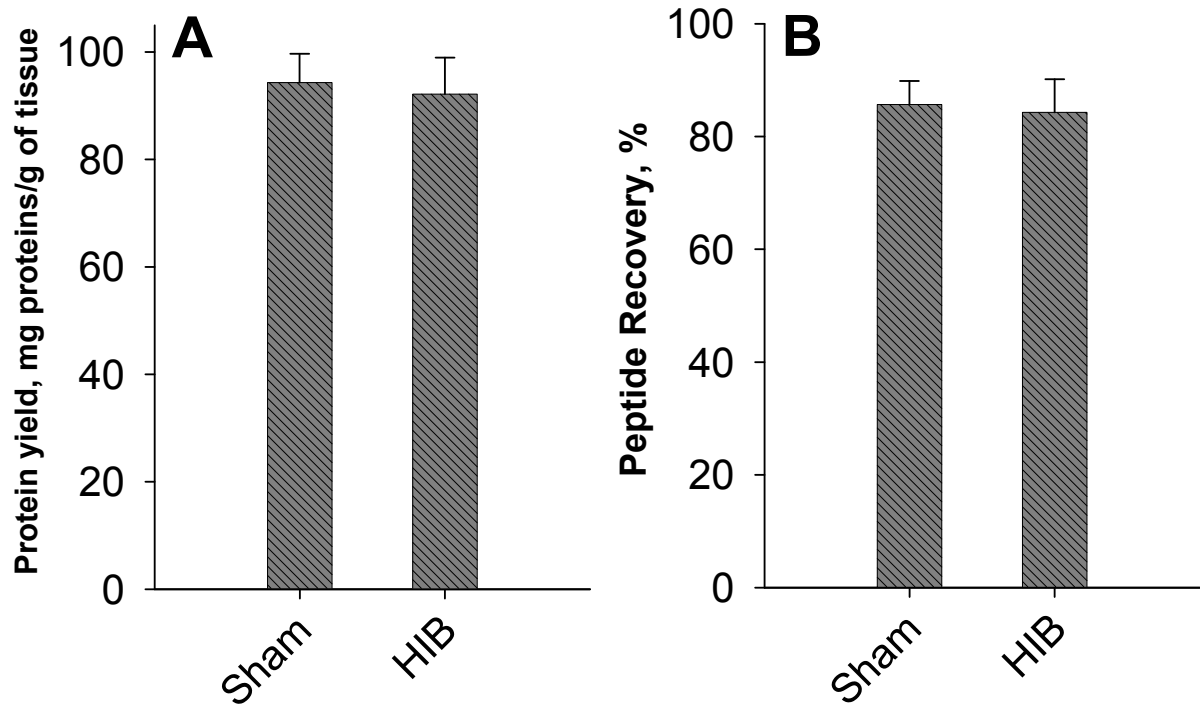

**SI Figure 1. Efficient and reproducible extraction of the LAD heart tissues and protein digestion in the Sham and Hibernating pigs (N=12/group).** (A) Protein extraction yields from myocardial samples using a cocktail of detergents. (B) The peptide recoveries of the precipitation/on-pellet-digestion procedure, which were determined by a modified BCA method.

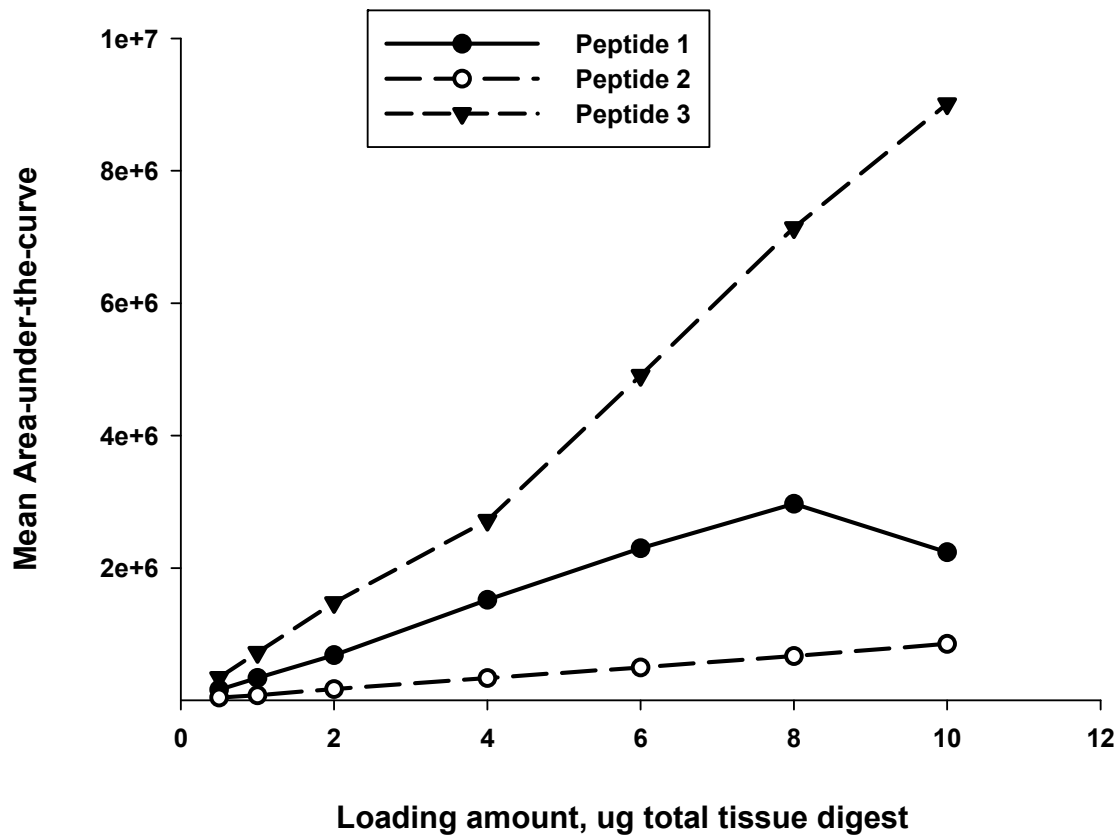

**SI Figure 2. The average peptide peak area responses vs. injection amounts of a heart tissue digest (in  $\mu\text{g}$  digested proteins,  $N=3$ ).** The polarity order of the three peptides are peptide 1>peptide 2>peptide 3. Peptide 1 is HKPHATEEQLR (from serum albumin;  $RT=10.5$  min on the nano-LC column, the first peak eluted), Peptide 2 is TIAMDGTEGLVR (from ATP synthase subunit beta, mitochondrial,  $RT=148$  min) and peptide 3 is TLATLNPESSLFIIASK (from glucose-6-phosphate isomerase,  $RT= 278$  min).

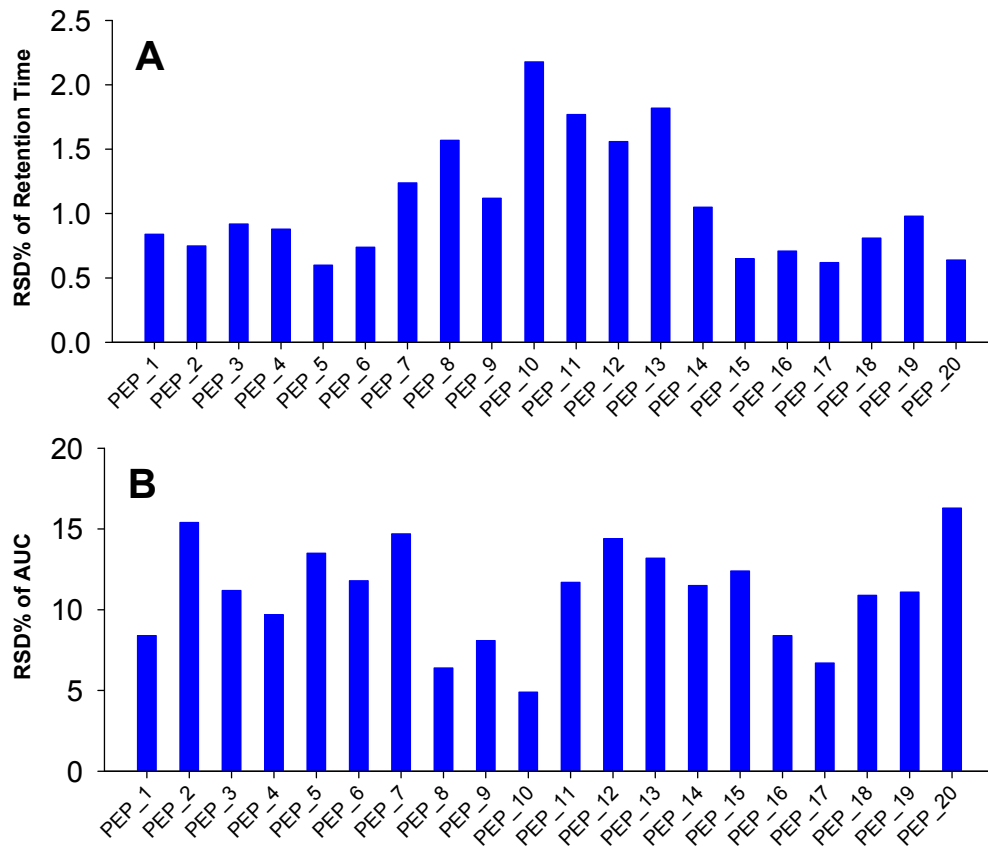

| Peptide # | Sequence                     | Protein                                                                  | Xcorr | Average Mass error (ppm) | Average RT (min) |
|-----------|------------------------------|--------------------------------------------------------------------------|-------|--------------------------|------------------|
| 1         | HKPHATEEQLR                  | serum albumin precursor                                                  | 3.99  | -0.47                    | 10.27            |
| 2         | RPVVSAGLHR                   | NADH dehydrogenase                                                       | 4.37  | 1.84                     | 28.10            |
| 3         | SGGASHSELIHNL                | protein-L-isoaspartate(D-aspartate) O-methyltransferase                  | 3.80  | -3.03                    | 49.68            |
| 4         | VDNSSLTGESEPQTR              | sodium/potassium-transporting ATPase subunit alpha-1 precursor           | 3.99  | -2.58                    | 69.78            |
| 5         | NLSNLQYQER                   | nebullette isoform 1                                                     | 2.79  | 3.30                     | 89.67            |
| 6         | AAAEVNDQYGLDPK               | fumarate hydratase                                                       | 3.49  | 10.22                    | 107.64           |
| 7         | DYESASLTEVR                  | alpha-actinin-2                                                          | 3.78  | 3.63                     | 127.01           |
| 8         | TIAMDGTEGLVR                 | ATP synthase subunit beta, mitochondrial                                 | 3.54  | 5.06                     | 148.61           |
| 9         | AYEAQTEPVLVEYYR              | GTP:AMP phosphotransferase, mitochondrial isoform 1                      | 3.24  | 4.91                     | 166.77           |
| 10        | TPYTDVNIVTIR                 | isocitrate dehydrogenase [NAD] subunit alpha, mitochondrial              | 3.36  | 2.30                     | 184.38           |
| 11        | LTGADGTPPGFLLK               | mitochondrial 2-oxoglutarate/malate carrier protein                      | 3.32  | 5.14                     | 198.52           |
| 12        | NQSSLVLIGDAFK                | myomesin-2                                                               | 4.51  | 8.51                     | 226.79           |
| 13        | NNLLQAELEELR                 | myosin-7                                                                 | 3.68  | 4.47                     | 239.48           |
| 14        | AQFGQPEILLGTIPGTGGTQR        | enoyl-CoA hydratase, mitochondrial                                       | 3.45  | 3.65                     | 251.42           |
| 15        | LAPITSDPTEAAAVGAVEASFK       | pyruvate kinase isozymes M1/M2 isoform 1                                 | 3.95  | 0.78                     | 263.66           |
| 16        | TLATLNPESSLFIIASK            | glucose-6-phosphate isomerase                                            | 3.90  | 3.47                     | 278.02           |
| 17        | DALSDLALHFLNK                | T-complex protein 1 subunit delta-like                                   | 3.68  | 5.76                     | 291.61           |
| 18        | FVTVYPGDIILGTGPAGVGVFR       | fumarylacetoacetate hydrolase domain-containing protein 2-like isoform 2 | 3.65  | 8.64                     | 311.27           |
| 19        | LLTIELNPDNAAIAQQVVDVDFAGLQDR | catechol O-methyltransferase                                             | 3.76  | 8.54                     | 330.23           |
| 20        | LEQLSPFPFDLLLQEVQK           | 2-oxoglutarate dehydrogenase, mitochondrial-like                         | 3.65  | 6.96                     | 353.60           |

**SI Figure 3. The reproducibility of (A) retention times and (B) areas-under-the-curves(AUC) of the twenty representative peptides randomly selected across the entire retention time window, for 24 runs of a pooled tissue sample (N=24).**

SI Table 1. The 911 unique protein groups confidently quantified by the ion current-based strategy

| Accession No./Protein name | Species | Description                                                                    | Peptides Quantified | Ratio (HIB vs. Sham) | Pvalue (HIB vs. Sham) |
|----------------------------|---------|--------------------------------------------------------------------------------|---------------------|----------------------|-----------------------|
| A1XQR7 QIL1                | PIG     | Protein QIL1                                                                   | 2                   | 0.78                 | <0.01                 |
| A2A2Z9 AN18B               | HUMAN   | Ankyrin repeat domain-containing protein 18B                                   | 2                   | 0.85                 | 0.53                  |
| A2PYH4 HFM1                | HUMAN   | Probable ATP-dependent DNA helicase HFM1                                       | 3                   | 1.01                 | 0.05                  |
| A2RRP1 NBAS                | HUMAN   | Neuroblastoma-amplified sequence                                               | 2                   | 1.18                 | 0.06                  |
| A4D1E1 Z804B               | HUMAN   | Zinc finger protein 804B                                                       | 2                   | 0.88                 | 0.18                  |
| A4D1F6 YG015               | HUMAN   | Leucine-rich repeat and death domain-containing protein LOC401387              | 2                   | 1.16                 | 0.19                  |
| A4D2P6 GRD2I               | HUMAN   | Delphinin                                                                      | 4                   | 0.73                 | <0.01                 |
| A4FU49 CA113               | HUMAN   | SH3 domain-containing protein C1orf113                                         | 2                   | 1.55                 | 0.05                  |
| A4FU69 EFCB5               | HUMAN   | EF-hand calcium-binding domain-containing protein 5                            | 2                   | 0.90                 | 0.15                  |
| A4UGR9 XIRP2               | HUMAN   | Xin actin-binding repeat-containing protein 2                                  | 8                   | 1.09                 | <0.01                 |
| A4Z6H0 PURA1               | PIG     | Adenylosuccinate synthetase isozyme 1                                          | 4                   | 0.93                 | 0.05                  |
| A5A3E0 POTEF               | HUMAN   | POTE ankyrin domain family member F                                            | 8                   | 1.14                 | <0.01                 |
| A5GFS8 VAPB                | PIG     | Vesicle-associated membrane protein-associated protein B                       | 2                   | 1.02                 | 0.32                  |
| A6H8Y1 BDP1                | HUMAN   | Transcription factor TFIIIB component B'' homolog                              | 6                   | 0.95                 | 0.02                  |
| A6NL28 TPM3L               | HUMAN   | Putative tropomyosin alpha-3 chain-like protein                                | 2                   | 0.93                 | <0.01                 |
| A6NNC1 P12LL               | HUMAN   | Putative POM121-like protein 1-like                                            | 12                  | 0.86                 | <0.01                 |
| A6NNM8 TTL13               | HUMAN   | Tubulin polyglutamylase TTL13                                                  | 5                   | 0.72                 | <0.01                 |
| A6QL64 AN36A               | HUMAN   | Ankyrin repeat domain-containing protein 36A                                   | 2                   | 1.33                 | <0.01                 |
| A7E2Y1 MYH7B               | HUMAN   | Myosin-7B                                                                      | 5                   | 0.87                 | <0.01                 |
| B1AJZ9 FHAD1               | HUMAN   | Forkhead-associated domain-containing protein 1                                | 4                   | 0.84                 | 0.61                  |
| B2RTY4 MYO9A               | HUMAN   | Myosin-Ixa                                                                     | 6                   | 0.95                 | 0.18                  |
| O00151 PDLI1               | HUMAN   | PDZ and LIM domain protein 1                                                   | 4                   | 1.08                 | <0.01                 |
| O00160 MYO1F               | HUMAN   | Myosin-Ilf                                                                     | 3                   | 0.96                 | 0.13                  |
| O00299 CLIC1               | HUMAN   | Chloride intracellular channel protein 1                                       | 3                   | 1.48                 | <0.01                 |
| O00311 CDC7                | HUMAN   | Cell division cycle 7-related protein kinase                                   | 3                   | 0.81                 | 0.23                  |
| O00329 PK3CD               | HUMAN   | Phosphatidylinositol-4,5-bisphosphate 3-kinase catalytic subunit delta isoform | 2                   | 0.89                 | 0.12                  |
| O00330 ODPX                | HUMAN   | Pyruvate dehydrogenase protein X component, mitochondrial                      | 2                   | 0.85                 | <0.01                 |
| O00411 RPOM                | HUMAN   | DNA-directed RNA polymerase, mitochondrial                                     | 2                   | 0.93                 | 0.72                  |
| O00555 CAC1A               | HUMAN   | Voltage-dependent P/Q-type calcium channel subunit alpha-1A                    | 8                   | 1.00                 | 0.01                  |
| O02705 HS90A               | PIG     | Heat shock protein HSP 90-alpha                                                | 11                  | 1.62                 | <0.01                 |
| O02772 FABPH               | PIG     | Fatty acid-binding protein, heart                                              | 6                   | 0.87                 | <0.01                 |
| O14497 ARI1A               | HUMAN   | AT-rich interactive domain-containing protein 1A                               | 4                   | 0.77                 | <0.01                 |
| O14558 HSPB6               | HUMAN   | Heat shock protein beta-6                                                      | 5                   | 1.54                 | <0.01                 |
| O14727 APAF                | HUMAN   | Apoptotic protease-activating factor 1                                         | 2                   | 1.03                 | 0.84                  |
| O14737 PDZD5               | HUMAN   | Programmed cell death protein 5                                                | 2                   | 0.72                 | <0.01                 |
| O14827 RGRF2               | HUMAN   | Ras-specific guanine nucleotide-releasing factor 2                             | 2                   | 0.76                 | 0.03                  |
| O14958 CASQ2               | HUMAN   | Calsequestrin-2                                                                | 5                   | 0.89                 | 0.11                  |
| O15014 ZN609               | HUMAN   | Zinc finger protein 609                                                        | 6                   | 0.83                 | <0.01                 |
| O15016 TRI66               | HUMAN   | Tripartite motif-containing protein 66                                         | 2                   | 0.72                 | 0.01                  |
| O15018 PDZD2               | HUMAN   | PDZ domain-containing protein 2                                                | 4                   | 1.06                 | 0.98                  |
| O15021 MAST4               | HUMAN   | Microtubule-associated serine/threonine-protein kinase 4                       | 6                   | 0.89                 | <0.01                 |
| O15031 PLXB2               | HUMAN   | Plexin-B2                                                                      | 3                   | 0.81                 | <0.01                 |

|              |       |                                                                      |    |      |       |
|--------------|-------|----------------------------------------------------------------------|----|------|-------|
| O15050 TRNK1 | HUMAN | TPR and ankyrin repeat-containing protein 1                          | 3  | 1.06 | 0.02  |
| O15061 SYNEM | HUMAN | Synemin                                                              | 2  | 0.96 | 0.05  |
| O15078 CE290 | HUMAN | Centrosomal protein of 290 kDa                                       | 3  | 0.85 | 0.12  |
| O15144 ARPC2 | HUMAN | Actin-related protein 2/3 complex subunit 2                          | 2  | 0.57 | <0.01 |
| O15417 TNC18 | HUMAN | Trinucleotide repeat-containing gene 18 protein                      | 7  | 0.97 | <0.01 |
| O15504 NUPL2 | HUMAN | Nucleoporin-like protein 2                                           | 4  | 0.87 | 0.01  |
| O19069 SUCA  | PIG   | Succinyl-CoA ligase [GDP-forming] subunit alpha, mitochondrial       | 2  | 1.12 | <0.01 |
| O43181 NDUS4 | HUMAN | NADH dehydrogenase [ubiquinone] iron-sulfur protein 4, mitochondrial | 2  | 0.99 | 0.05  |
| O43242 PSMD3 | HUMAN | 26S proteasome non-ATPase regulatory subunit 3                       | 2  | 0.94 | 0.55  |
| O43379 WDR62 | HUMAN | WD repeat-containing protein 62                                      | 2  | 1.26 | 0.01  |
| O43424 GRID2 | HUMAN | Glutamate receptor delta-2 subunit                                   | 2  | 1.17 | <0.01 |
| O43432 IF4G3 | HUMAN | Eukaryotic translation initiation factor 4 gamma 3                   | 4  | 1.13 | <0.01 |
| O43615 TIM44 | HUMAN | Mitochondrial import inner membrane translocase subunit TIM44        | 4  | 1.11 | <0.01 |
| O43707 ACTN4 | HUMAN | Alpha-actinin-4                                                      | 11 | 1.36 | <0.01 |
| O43837 IDH3B | HUMAN | Isocitrate dehydrogenase [NAD] subunit beta, mitochondrial           | 4  | 0.92 | <0.01 |
| O60229 KALRN | HUMAN | Kalirin                                                              | 4  | 1.11 | 0.01  |
| O60281 ZN292 | HUMAN | Zinc finger protein 292                                              | 2  | 1.01 | 1.00  |
| O60293 ZC3H1 | HUMAN | Zinc finger C3H1 domain-containing protein                           | 4  | 0.90 | 0.01  |
| O60313 OPA1  | HUMAN | Dynamin-like 120 kDa protein, mitochondrial                          | 5  | 0.96 | 0.01  |
| O60333 KIF1B | HUMAN | Kinesin-like protein KIF1B                                           | 2  | 0.89 | 0.28  |
| O60447 EVI5  | HUMAN | Ecotropic viral integration site 5 protein homolog                   | 2  | 0.82 | 0.37  |
| O60449 LY75  | HUMAN | Lymphocyte antigen 75                                                | 4  | 0.75 | <0.01 |
| O60469 DSCAM | HUMAN | Down syndrome cell adhesion molecule                                 | 2  | 1.02 | 0.03  |
| O60486 PLXC1 | HUMAN | Plexin-C1                                                            | 3  | 0.85 | <0.01 |
| O60673 DPOLZ | HUMAN | DNA polymerase zeta catalytic subunit                                | 6  | 1.14 | 0.17  |
| O60763 USO1  | HUMAN | General vesicular transport factor p115                              | 2  | 1.09 | 0.48  |
| O60879 DIAP2 | HUMAN | Protein diaphanous homolog 2                                         | 4  | 1.12 | 0.31  |
| O60942 MCE1  | HUMAN | mRNA-capping enzyme 1-phosphatidylinositol-4,5-bisphosphate          | 3  | 0.97 | 0.29  |
| O75038 PLCH2 | HUMAN | phosphodiesterase eta-2                                              | 2  | 0.74 | <0.01 |
| O75061 AUX1  | HUMAN | Putative tyrosine-protein phosphatase auxilin                        | 2  | 0.96 | 0.05  |
| O75083 WDR1  | HUMAN | WD repeat-containing protein 1                                       | 2  | 1.49 | <0.01 |
| O75112 LDB3  | HUMAN | LIM domain-binding protein 3                                         | 6  | 0.89 | <0.01 |
| O75150 BRE1B | HUMAN | E3 ubiquitin-protein ligase BRE1B                                    | 2  | 0.67 | <0.01 |
| O75306 NDUS2 | HUMAN | NADH dehydrogenase [ubiquinone] iron-sulfur protein 2, mitochondrial | 2  | 0.78 | <0.01 |
| O75323 NIPS2 | HUMAN | Protein NipSnap homolog 2                                            | 2  | 0.96 | 0.51  |
| O75339 CILP1 | HUMAN | Cartilage intermediate layer protein 1                               | 5  | 0.87 | <0.01 |
| O75369 FLNB  | HUMAN | Filamin-B                                                            | 7  | 1.08 | <0.01 |
| O75376 NCOR1 | HUMAN | Nuclear receptor corepressor 1                                       | 3  | 1.15 | 0.44  |
| O75489 NDUS3 | HUMAN | NADH dehydrogenase [ubiquinone] iron-sulfur protein 3, mitochondrial | 4  | 0.95 | 0.02  |
| O75592 MYCB2 | HUMAN | Probable E3 ubiquitin-protein ligase MYCBP2                          | 7  | 0.89 | 0.09  |
| O75608 LYPA1 | HUMAN | Acyl-protein thioesterase 1                                          | 2  | 1.03 | 0.38  |
| O75746 CMC1  | HUMAN | Calcium-binding mitochondrial carrier protein Aralar1                | 8  | 0.84 | <0.01 |
| O75964 ATP5L | HUMAN | ATP synthase subunit g, mitochondrial                                | 2  | 0.94 | 0.24  |
| O76041 NEBL  | HUMAN | Nebulette                                                            | 7  | 0.89 | <0.01 |
| O94822 RN160 | HUMAN | RING finger protein 160                                              | 2  | 0.68 | 0.10  |
| O94875 SRBS2 | HUMAN | Sorbin and SH3 domain-containing protein 2                           | 3  | 1.33 | <0.01 |
| O94913 PCF11 | HUMAN | Pre-mRNA cleavage complex 2 protein Pcf11                            | 3  | 1.03 | 0.05  |

|              |       |                                                                          |    |      |       |
|--------------|-------|--------------------------------------------------------------------------|----|------|-------|
| O94986 CE152 | HUMAN | Centrosomal protein of 152 kDa                                           | 3  | 1.13 | 0.06  |
| O94989 ARHGF | HUMAN | Rho guanine nucleotide exchange factor 15                                | 2  | 0.99 | 0.26  |
| O95153 RIMB1 | HUMAN | Peripheral-type benzodiazepine receptor-associated protein 1             | 2  | 1.50 | 0.36  |
| O95202 LETM1 | HUMAN | LETM1 and EF-hand domain-containing protein 1, mitochondrial             | 2  | 0.97 | 1.00  |
| O95239 KIF4A | HUMAN | Chromosome-associated kinesin KIF4A                                      | 3  | 0.93 | <0.01 |
| O95251 MYST2 | HUMAN | Histone acetyltransferase MYST2                                          | 2  | 0.83 | 0.03  |
| O95347 SMC2  | HUMAN | Structural maintenance of chromosomes protein 2                          | 3  | 0.88 | 0.10  |
| O95425 SVIL  | HUMAN | Supervillin                                                              | 2  | 0.92 | 0.01  |
| O95563 BR44  | HUMAN | Brain protein 44                                                         | 2  | 1.08 | 0.05  |
| O95613 PCNT  | HUMAN | Pericentrin                                                              | 5  | 0.87 | 0.01  |
| O95704 APBB3 | HUMAN | Amyloid beta A4 precursor protein-binding family B member 3              | 2  | 0.89 | 0.10  |
| O95786 DDX58 | HUMAN | Probable ATP-dependent RNA helicase DDX58                                | 2  | 0.75 | 0.04  |
| O95810 SDPR  | HUMAN | Serum deprivation-response protein                                       | 3  | 1.28 | <0.01 |
| O95817 BAG3  | HUMAN | BAG family molecular chaperone regulator 3                               | 2  | 0.96 | 0.45  |
| O95831 AIFM1 | HUMAN | Apoptosis-inducing factor 1, mitochondrial                               | 6  | 1.02 | 0.81  |
| O95996 APC2  | HUMAN | Adenomatous polyposis coli protein 2                                     | 5  | 1.03 | 0.99  |
| O96028 NSD2  | HUMAN | Probable histone-lysine N-methyltransferase NSD2                         | 2  | 0.87 | 0.04  |
| O97580 SUCB1 | PIG   | Succinyl-CoA ligase [ADP-forming] subunit beta, mitochondrial (Fragment) | 5  | 0.90 | <0.01 |
| O97788 FABP4 | PIG   | Fatty acid-binding protein, adipocyte                                    | 2  | 0.85 | 0.28  |
| P00172 CYB5  | PIG   | Cytochrome b5                                                            | 2  | 1.18 | 0.80  |
| P00336 LDHB  | PIG   | L-lactate dehydrogenase B chain                                          | 10 | 0.80 | <0.01 |
| P00339 LDHA  | PIG   | L-lactate dehydrogenase A chain                                          | 2  | 2.13 | <0.01 |
| P00346 MDHM  | PIG   | Malate dehydrogenase, mitochondrial                                      | 15 | 0.76 | <0.01 |
| P00348 HCDH  | PIG   | Hydroxyacyl-coenzyme A dehydrogenase, mitochondrial                      | 5  | 0.80 | <0.01 |
| P00355 G3P   | PIG   | Glyceraldehyde-3-phosphate dehydrogenase                                 | 9  | 1.35 | <0.01 |
| P00367 DHE3  | HUMAN | Glutamate dehydrogenase 1, mitochondrial                                 | 3  | 0.87 | <0.01 |
| P00451 FA8   | HUMAN | Coagulation factor VIII                                                  | 3  | 0.84 | 0.10  |
| P00503 AATC  | PIG   | Aspartate aminotransferase, cytoplasmic                                  | 12 | 0.93 | <0.01 |
| P00506 AATM  | PIG   | Aspartate aminotransferase, mitochondrial                                | 8  | 0.93 | 0.02  |
| P00568 KAD1  | HUMAN | Adenylate kinase isoenzyme 1                                             | 6  | 0.86 | <0.01 |
| P00761 TRYP  | PIG   | Trypsin                                                                  | 5  | 1.00 | <0.01 |
| P00795 CATD  | PIG   | Cathepsin D                                                              | 5  | 1.77 | <0.01 |
| P00889 CISY  | PIG   | Citrate synthase, mitochondrial                                          | 10 | 0.92 | <0.01 |
| P00915 CAH1  | HUMAN | Carbonic anhydrase 1                                                     | 2  | 1.14 | 0.76  |
| P01024 CO3   | HUMAN | Complement C3                                                            | 2  | 1.30 | 0.02  |
| P01846 LAC   | PIG   | Ig lambda chain C region                                                 | 2  | 0.83 | 0.91  |
| P01965 HBA   | PIG   | Hemoglobin subunit alpha                                                 | 7  | 1.23 | <0.01 |
| P02067 HBB   | PIG   | Hemoglobin subunit beta                                                  | 9  | 1.13 | <0.01 |
| P02189 MYG   | PIG   | Myoglobin                                                                | 5  | 0.86 | <0.01 |
| P02540 DESM  | PIG   | Desmin                                                                   | 22 | 1.76 | <0.01 |
| P03952 KLKB1 | HUMAN | Plasma kallikrein                                                        | 2  | 0.83 | 0.01  |
| P03974 TERA  | PIG   | Transitional endoplasmic reticulum ATPase                                | 7  | 1.48 | <0.01 |
| P04075 ALDOA | HUMAN | Fructose-bisphosphate aldolase A                                         | 6  | 0.99 | 0.88  |
| P04114 APOB  | HUMAN | Apolipoprotein B-100                                                     | 2  | 1.49 | 0.01  |
| P04181 OAT   | HUMAN | Ornithine aminotransferase, mitochondrial                                | 2  | 0.86 | <0.01 |
| P04264 K2C1  | HUMAN | Keratin, type II cytoskeletal 1                                          | 3  | 0.71 | <0.01 |
| P05024 AT1A1 | PIG   | Sodium/potassium-transporting ATPase subunit alpha-1                     | 8  | 0.98 | 0.33  |
| P05027 AT1B1 | PIG   | Sodium/potassium-transporting ATPase subunit beta-1                      | 2  | 0.89 | 0.03  |
| P05141 ADT2  | HUMAN | ADP/ATP translocase 2                                                    | 4  | 0.90 | 0.20  |
| P06576 ATPB  | HUMAN | ATP synthase subunit beta, mitochondrial                                 | 24 | 0.87 | <0.01 |

|              |       |                                                                                                          |    |      |       |
|--------------|-------|----------------------------------------------------------------------------------------------------------|----|------|-------|
| P06733 ENOA  | HUMAN | Alpha-enolase                                                                                            | 4  | 1.46 | <0.01 |
| P06744 GGPI  | HUMAN | Glucose-6-phosphate isomerase                                                                            | 3  | 1.17 | <0.01 |
| P06753 TPM3  | HUMAN | Tropomyosin alpha-3 chain                                                                                | 5  | 0.89 | <0.01 |
| P07237 PDIA1 | HUMAN | Protein disulfide-isomerase                                                                              | 2  | 1.63 | <0.01 |
| P07437 TBBS  | HUMAN | Tubulin beta chain                                                                                       | 14 | 1.66 | <0.01 |
| P07737 PROF1 | HUMAN | Profilin-1                                                                                               | 2  | 1.28 | <0.01 |
| P07951 TPM2  | HUMAN | Tropomyosin beta chain                                                                                   | 5  | 0.87 | <0.01 |
| P07954 FUMH  | HUMAN | Fumarate hydratase, mitochondrial                                                                        | 9  | 0.74 | <0.01 |
| P08133 ANXA6 | HUMAN | Annexin A6                                                                                               | 3  | 1.11 | <0.01 |
| P08238 HS90B | HUMAN | Heat shock protein HSP 90-beta                                                                           | 8  | 1.66 | <0.01 |
| P08574 CY1   | HUMAN | Cytochrome c1, heme protein, mitochondrial                                                               | 3  | 0.86 | <0.01 |
| P08590 MYL3  | HUMAN | Myosin light chain 3                                                                                     | 8  | 0.77 | <0.01 |
| P08670 VIME  | HUMAN | Vimentin                                                                                                 | 13 | 1.96 | <0.01 |
| P08686 CP21A | HUMAN | Steroid 21-hydroxylase                                                                                   | 2  | 0.86 | 0.01  |
| P08758 ANXA5 | HUMAN | Annexin A5                                                                                               | 5  | 1.54 | <0.01 |
| P08835 ALBU  | PIG   | Serum albumin                                                                                            | 21 | 1.14 | <0.01 |
| P08865 RSSA  | HUMAN | 40S ribosomal protein SA                                                                                 | 3  | 1.52 | <0.01 |
| P09493 TPM1  | HUMAN | Tropomyosin alpha-1 chain                                                                                | 11 | 0.87 | <0.01 |
| P09571 TRFE  | PIG   | Serotransferrin                                                                                          | 14 | 1.21 | <0.01 |
| P09874 PARP1 | HUMAN | Poly [ADP-ribose] polymerase 1                                                                           | 2  | 1.25 | <0.01 |
| P09913 IFIT2 | HUMAN | Interferon-induced protein with tetratricopeptide repeats 2                                              | 2  | 1.26 | <0.01 |
| P09972 ALDOC | HUMAN | Fructose-bisphosphate aldolase C                                                                         | 2  | 0.96 | <0.01 |
| P0C7P4 UCRIL | HUMAN | Putative cytochrome b-c1 complex subunit Rieske-like protein 1                                           | 2  | 0.78 | <0.01 |
| P0C881 R10B1 | HUMAN | Radial spoke head 10 homolog B                                                                           | 2  | 1.41 | <0.01 |
| P10515 ODP2  | HUMAN | Dihydrolipoyllysine-residue acetyltransferase component of pyruvate dehydrogenase complex, mitochondrial | 5  | 0.82 | <0.01 |
| P10600 TGFB3 | HUMAN | Transforming growth factor beta-3                                                                        | 2  | 1.06 | 0.45  |
| P10644 KAP0  | HUMAN | cAMP-dependent protein kinase type I-alpha regulatory subunit                                            | 2  | 0.98 | 1.00  |
| P10809 CH60  | HUMAN | 60 kDa heat shock protein, mitochondrial                                                                 | 10 | 0.99 | <0.01 |
| P10916 MLRV  | HUMAN | Myosin regulatory light chain 2, ventricular/cardiac muscle isoform                                      | 7  | 0.86 | <0.01 |
| P11021 GRP78 | HUMAN | 78 kDa glucose-regulated protein                                                                         | 13 | 1.47 | <0.01 |
| P11055 MYH3  | HUMAN | Myosin-3                                                                                                 | 21 | 0.86 | <0.01 |
| P11137 MAP2  | HUMAN | Microtubule-associated protein 2                                                                         | 2  | 1.14 | 0.64  |
| P11142 HSP7C | HUMAN | Heat shock cognate 71 kDa protein                                                                        | 12 | 1.38 | <0.01 |
| P11177 ODPB  | HUMAN | Pyruvate dehydrogenase E1 component subunit beta, mitochondrial                                          | 5  | 0.72 | <0.01 |
| P11216 PYGB  | HUMAN | Glycogen phosphorylase, brain form                                                                       | 10 | 1.20 | <0.01 |
| P11217 PYGM  | HUMAN | Glycogen phosphorylase, muscle form                                                                      | 6  | 1.35 | <0.01 |
| P11277 SPTB1 | HUMAN | Spectrin beta chain, erythrocyte                                                                         | 3  | 1.03 | <0.01 |
| P11387 TOP1  | HUMAN | DNA topoisomerase 1                                                                                      | 3  | 1.03 | 0.20  |
| P11388 TOP2A | HUMAN | DNA topoisomerase 2-alpha                                                                                | 2  | 0.76 | 0.10  |
| P11607 AT2A2 | PIG   | Sarcoplasmic/endoplasmic reticulum calcium ATPase 2                                                      | 19 | 0.72 | <0.01 |
| P11708 MDHC  | PIG   | Malate dehydrogenase, cytoplasmic                                                                        | 7  | 1.04 | 0.94  |
| P11717 MPRI  | HUMAN | Cation-independent mannose-6-phosphate receptor                                                          | 3  | 0.80 | <0.01 |
| P12026 ACBP  | PIG   | Acyl-CoA-binding protein                                                                                 | 2  | 1.31 | <0.01 |
| P12081 SYHC  | HUMAN | Histidyl-tRNA synthetase, cytoplasmic                                                                    | 2  | 0.92 | 0.78  |
| P12109 CO6A1 | HUMAN | Collagen alpha-1(VI) chain                                                                               | 2  | 1.59 | 0.02  |
| P12110 CO6A2 | HUMAN | Collagen alpha-2(VI) chain                                                                               | 3  | 1.12 | 0.07  |
| P12111 CO6A3 | HUMAN | Collagen alpha-3(VI) chain                                                                               | 6  | 0.80 | <0.01 |
| P12235 ADT1  | HUMAN | ADP/ATP translocase 1                                                                                    | 5  | 0.98 | 1.00  |
| P12236 ADT3  | HUMAN | ADP/ATP translocase 3                                                                                    | 5  | 0.96 | 0.36  |
| P12270 TPR   | HUMAN | Nucleoprotein TPR                                                                                        | 3  | 1.37 | <0.01 |
| P12277 KCRB  | HUMAN | Creatine kinase B-type                                                                                   | 3  | 0.87 | <0.01 |
| P12682 HMGB1 | PIG   | High mobility group protein B1                                                                           | 2  | 0.84 | 0.15  |
| P12814 ACTN1 | HUMAN | Alpha-actinin-1                                                                                          | 15 | 1.17 | <0.01 |
| P12882 MYH1  | HUMAN | Myosin-1                                                                                                 | 19 | 0.84 | <0.01 |

|              |       |                                                                |    |      |       |
|--------------|-------|----------------------------------------------------------------|----|------|-------|
| P12883 MYH7  | HUMAN | Myosin-7                                                       | 81 | 0.85 | <0.01 |
| P13073 COX41 | HUMAN | Cytochrome c oxidase subunit 4 isoform 1, mitochondrial        | 2  | 0.82 | <0.01 |
| P13533 MYH6  | HUMAN | Myosin-6                                                       | 67 | 0.85 | <0.01 |
| P13535 MYH8  | HUMAN | Myosin-8                                                       | 19 | 0.80 | <0.01 |
| P13618 ATP5J | PIG   | ATP synthase-coupling factor 6, mitochondrial                  | 2  | 0.86 | <0.01 |
| P13639 EF2   | HUMAN | Elongation factor 2                                            | 11 | 1.35 | <0.01 |
| P13667 PDIA4 | HUMAN | Protein disulfide-isomerase A4                                 | 8  | 0.95 | 0.54  |
| P13796 PLSL  | HUMAN | Plastin-2                                                      | 2  | 3.32 | <0.01 |
| P13804 ETFA  | HUMAN | Electron transfer flavoprotein subunit alpha, mitochondrial    | 5  | 1.13 | 0.03  |
| P13807 GYS1  | HUMAN | Glycogen [starch] synthase, muscle                             | 4  | 1.43 | <0.01 |
| P13861 KAP2  | HUMAN | cAMP-dependent protein kinase type II-alpha regulatory subunit | 3  | 0.88 | <0.01 |
| P14618 KPYM  | HUMAN | Pyruvate kinase isozymes M1/M2                                 | 10 | 1.02 | <0.01 |
| P15259 PGAM2 | HUMAN | Phosphoglycerate mutase 2                                      | 2  | 1.09 | <0.01 |
| P15311 EZRI  | HUMAN | Ezrin                                                          | 4  | 1.02 | <0.01 |
| P15822 ZEP1  | HUMAN | Zinc finger protein 40                                         | 2  | 0.80 | 0.14  |
| P15880 RS2   | HUMAN | 40S ribosomal protein S2                                       | 3  | 1.00 | 0.92  |
| P15918 RAG1  | HUMAN | V(D)J recombination-activating protein 1                       | 4  | 1.21 | <0.01 |
| P15924 DESP  | HUMAN | Desmoplakin                                                    | 3  | 1.26 | <0.01 |
| P16276 ACON  | PIG   | Aconitate hydratase, mitochondrial                             | 23 | 0.98 | <0.01 |
| P16401 H15   | HUMAN | Histone H1.5                                                   | 2  | 1.05 | 0.25  |
| P16402 H13   | HUMAN | Histone H1.3                                                   | 4  | 1.49 | <0.01 |
| P17540 KCRS  | HUMAN | Creatine kinase S-type, mitochondrial                          | 12 | 1.03 | <0.01 |
| P17948 VGFR1 | HUMAN | Vascular endothelial growth factor receptor 1                  | 7  | 0.89 | 0.02  |
| P18648 APOA1 | PIG   | Apolipoprotein A-I                                             | 8  | 1.29 | <0.01 |
| P18669 PGAM1 | HUMAN | Phosphoglycerate mutase 1                                      | 4  | 1.17 | <0.01 |
| P19022 CADH2 | HUMAN | Cadherin-2                                                     | 4  | 1.00 | 0.99  |
| P19105 ML12A | HUMAN | Myosin regulatory light chain 12A                              | 2  | 1.36 | <0.01 |
| P19367 HKK1  | HUMAN | Hexokinase-1                                                   | 9  | 0.91 | <0.01 |
| P19404 NDUV2 | HUMAN | NADH dehydrogenase [ubiquinone] flavoprotein 2, mitochondrial  | 6  | 0.73 | <0.01 |
| P19429 TNNI3 | HUMAN | Troponin I, cardiac muscle                                     | 5  | 0.89 | <0.01 |
| P19619 ANXA1 | PIG   | Annexin A1                                                     | 3  | 1.61 | <0.01 |
| P19620 ANXA2 | PIG   | Annexin A2                                                     | 12 | 1.77 | <0.01 |
| P20305 GELS  | PIG   | Gelsolin (Fragment)                                            | 2  | 1.84 | <0.01 |
| P20774 MIME  | HUMAN | Mimecan                                                        | 2  | 1.00 | 0.69  |
| P20810 ICAL  | HUMAN | Calpastatin                                                    | 6  | 1.15 | <0.01 |
| P20929 NEBU  | HUMAN | Nebulin                                                        | 12 | 0.95 | <0.01 |
| P21333 FLNA  | HUMAN | Filamin-A                                                      | 6  | 1.49 | <0.01 |
| P21980 TGM2  | HUMAN | Protein-glutamine gamma-glutamyltransferase 2                  | 2  | 0.97 | 0.23  |
| P22105 TENX  | HUMAN | Tenascin-X                                                     | 2  | 1.03 | 0.01  |
| P22314 UBA1  | HUMAN | Ubiquitin-like modifier-activating enzyme 1                    | 2  | 1.53 | <0.01 |
| P22626 ROA2  | HUMAN | Heterogeneous nuclear ribonucleoproteins A2/B1                 | 2  | 1.48 | <0.01 |
| P22695 QCR2  | HUMAN | Cytochrome b-c1 complex subunit 2, mitochondrial               | 3  | 0.72 | <0.01 |
| P23378 GCSF  | HUMAN | Glycine dehydrogenase [decarboxylating], mitochondrial         | 3  | 0.85 | 0.01  |
| P23396 RS3   | HUMAN | 40S ribosomal protein S3                                       | 2  | 1.26 | <0.01 |
| P23467 PTPRB | HUMAN | Receptor-type tyrosine-protein phosphatase beta                | 4  | 0.97 | 0.02  |
| P23497 SP100 | HUMAN | Nuclear autoantigen Sp-100                                     | 3  | 0.92 | 0.67  |
| P23528 COF1  | HUMAN | Cofilin-1                                                      | 2  | 1.68 | <0.01 |
| P23588 IF4B  | HUMAN | Eukaryotic translation initiation factor 4B                    | 2  | 0.70 | <0.01 |
| P23687 PPCE  | PIG   | Prolyl endopeptidase                                           | 2  | 1.57 | 0.01  |
| P24043 LAMA2 | HUMAN | Laminin subunit alpha-2                                        | 2  | 0.87 | 0.57  |
| P24298 ALAT1 | HUMAN | Alanine aminotransferase 1                                     | 3  | 0.74 | <0.01 |
| P24534 EF1B  | HUMAN | Elongation factor 1-beta                                       | 3  | 1.50 | <0.01 |
| P25054 APC   | HUMAN | Adenomatous polyposis coli protein                             | 4  | 0.85 | 0.50  |
| P25391 LAMA1 | HUMAN | Laminin subunit alpha-1                                        | 3  | 0.78 | 0.39  |
| P25440 BRD2  | HUMAN | Bromodomain-containing protein 2                               | 2  | 1.14 | 0.33  |
| P25705 ATPA  | HUMAN | ATP synthase subunit alpha, mitochondrial                      | 14 | 0.98 | <0.01 |
| P26038 MOES  | HUMAN | Moesin                                                         | 5  | 1.52 | <0.01 |
| P26196 DDX6  | HUMAN | Probable ATP-dependent RNA helicase DDX6                       | 2  | 1.12 | 0.68  |
| P26234 VINC  | PIG   | Vinculin                                                       | 18 | 1.28 | <0.01 |



|              |       |                                                                                           |    |      |       |
|--------------|-------|-------------------------------------------------------------------------------------------|----|------|-------|
| P26440 IVD   | HUMAN | Isovaleryl-CoA dehydrogenase, mitochondrial                                               | 2  | 0.55 | <0.01 |
| P26641 EF1G  | HUMAN | Elongation factor 1-gamma                                                                 | 2  | 1.69 | <0.01 |
| P26678 PPLA  | HUMAN | Cardiac phospholamban                                                                     | 2  | 0.96 | 0.92  |
| P27348 1433T | HUMAN | 14-3-3 protein theta                                                                      | 2  | 1.41 | <0.01 |
| P27797 CALR  | HUMAN | Calreticulin                                                                              | 3  | 1.34 | <0.01 |
| P27816 MAP4  | HUMAN | Microtubule-associated protein 4                                                          | 6  | 0.89 | <0.01 |
| P27824 CALX  | HUMAN | Calnexin                                                                                  | 2  | 0.97 | <0.01 |
| P28289 TMOD1 | HUMAN | Tropomodulin-1                                                                            | 6  | 0.90 | <0.01 |
| P28329 CLAT  | HUMAN | Choline O-acetyltransferase                                                               | 2  | 1.09 | 0.02  |
| P28331 NDUS1 | HUMAN | NADH-ubiquinone oxidoreductase 75 kDa subunit, mitochondrial                              | 9  | 0.88 | <0.01 |
| P28482 MK01  | HUMAN | Mitogen-activated protein kinase 1                                                        | 3  | 1.20 | 0.08  |
| P29375 KDM5A | HUMAN | Lysine-specific demethylase 5A                                                            | 2  | 1.51 | 0.04  |
| P29536 LMOD1 | HUMAN | Leiomodin-1                                                                               | 2  | 0.92 | 0.56  |
| P29692 EF1D  | HUMAN | Elongation factor 1-delta                                                                 | 2  | 1.46 | <0.01 |
| P29700 FETUA | PIG   | Alpha-2-HS-glycoprotein (Fragment)                                                        | 4  | 1.15 | <0.01 |
| P29804 ODPA  | PIG   | Pyruvate dehydrogenase E1 component subunit alpha, somatic form, mitochondrial (Fragment) | 7  | 0.74 | <0.01 |
| P29966 MARCS | HUMAN | Myristoylated alanine-rich C-kinase substrate                                             | 2  | 0.75 | 0.43  |
| P30048 PRDX3 | HUMAN | Thioredoxin-dependent peroxide reductase, mitochondrial                                   | 3  | 0.75 | <0.01 |
| P30086 PEBP1 | HUMAN | Phosphatidylethanolamine-binding protein 1                                                | 3  | 0.74 | <0.01 |
| P30101 PDIA3 | HUMAN | Protein disulfide-isomerase A3                                                            | 3  | 1.31 | <0.01 |
| P30153 2AAA  | HUMAN | Serine/threonine-protein phosphatase 2A 65 kDa regulatory subunit A alpha isoform         | 2  | 1.24 | <0.01 |
| P30622 CLIP1 | HUMAN | CAP-Gly domain-containing linker protein 1                                                | 4  | 1.13 | 0.07  |
| P31150 GDIA  | HUMAN | Rab GDP dissociation inhibitor alpha                                                      | 3  | 1.18 | <0.01 |
| P31629 ZEP2  | HUMAN | Transcription factor HIVEP2                                                               | 5  | 0.94 | 0.03  |
| P31930 QCR1  | HUMAN | Cytochrome b-c1 complex subunit 1, mitochondrial                                          | 5  | 0.89 | <0.01 |
| P31946 1433B | HUMAN | 14-3-3 protein beta/alpha                                                                 | 3  | 1.62 | <0.01 |
| P33121 ACSL1 | HUMAN | Long-chain-fatty-acid--CoA ligase 1                                                       | 2  | 0.88 | <0.01 |
| P33176 KINH  | HUMAN | Kinesin-1 heavy chain                                                                     | 2  | 1.29 | <0.01 |
| P33198 IDHP  | PIG   | Isocitrate dehydrogenase [NADP], mitochondrial (Fragment)                                 | 16 | 0.95 | <0.01 |
| P34932 HSP74 | HUMAN | Heat shock 70 kDa protein 4                                                               | 3  | 0.91 | 0.15  |
| P35221 CTNA1 | HUMAN | Catenin alpha-1                                                                           | 6  | 1.12 | <0.01 |
| P35222 CTNB1 | HUMAN | Catenin beta-1                                                                            | 5  | 0.97 | 0.07  |
| P35232 PHB   | HUMAN | Prohibitin                                                                                | 4  | 1.16 | <0.01 |
| P35241 RADI  | HUMAN | Radixin                                                                                   | 2  | 1.62 | <0.01 |
| P35251 RFC1  | HUMAN | Replication factor C subunit 1                                                            | 2  | 0.89 | 0.09  |
| P35579 MYH9  | HUMAN | Myosin-9                                                                                  | 18 | 1.22 | <0.01 |
| P35580 MYH10 | HUMAN | Myosin-10                                                                                 | 2  | 1.38 | <0.01 |
| P35609 ACTN2 | HUMAN | Alpha-actinin-2                                                                           | 30 | 1.14 | <0.01 |
| P35749 MYH11 | HUMAN | Myosin-11                                                                                 | 5  | 1.41 | <0.01 |
| P36542 ATPG  | HUMAN | ATP synthase subunit gamma, mitochondrial                                                 | 2  | 1.05 | 0.68  |
| P36776 LONM  | HUMAN | Lon protease homolog, mitochondrial                                                       | 2  | 0.91 | 0.07  |
| P36871 PGM1  | HUMAN | Phosphoglucomutase-1                                                                      | 5  | 1.09 | <0.01 |
| P37111 ACY1  | PIG   | Aminoacylase-1                                                                            | 2  | 1.13 | <0.01 |
| P37802 TAGL2 | HUMAN | Transgelin-2                                                                              | 3  | 1.81 | <0.01 |
| P38646 GRP75 | HUMAN | Stress-70 protein, mitochondrial                                                          | 5  | 0.95 | <0.01 |
| P39687 AN32A | HUMAN | Acidic leucine-rich nuclear phosphoprotein 32 family member A                             | 2  | 1.02 | 0.08  |
| P41367 ACADM | PIG   | Medium-chain specific acyl-CoA dehydrogenase, mitochondrial                               | 5  | 1.02 | <0.01 |
| P42336 PK3CA | HUMAN | Phosphatidylinositol-4,5-bisphosphate 3-kinase catalytic subunit alpha isoform            | 4  | 1.01 | 0.32  |
| P42858 HD    | HUMAN | Huntingtin                                                                                | 4  | 1.00 | <0.01 |
| P43155 CACP  | HUMAN | Carnitine O-acetyltransferase                                                             | 4  | 1.00 | 0.02  |
| P45379 TNNT2 | HUMAN | Troponin T, cardiac muscle                                                                | 6  | 0.75 | <0.01 |
| P46013 KI67  | HUMAN | Antigen KI-67                                                                             | 10 | 0.92 | 0.01  |

|               |       |                                                                          |    |      |       |
|---------------|-------|--------------------------------------------------------------------------|----|------|-------|
| P46087 NOP2   | HUMAN | Putative ribosomal RNA methyltransferase NOP2                            | 2  | 0.97 | 0.05  |
| P46939 UTRO   | HUMAN | Utrophin                                                                 | 5  | 1.02 | 0.08  |
| P46940 IQGA1  | HUMAN | Ras GTPase-activating-like protein IQGAP1                                | 2  | 0.83 | 0.03  |
| P47756 CAPZB  | HUMAN | F-actin-capping protein subunit beta                                     | 2  | 1.13 | 0.01  |
| P47972 NPTX2  | HUMAN | Neuronal pentraxin-2                                                     | 2  | 1.17 | 0.16  |
| P48643 TCPE   | HUMAN | T-complex protein 1 subunit epsilon                                      | 2  | 0.86 | 0.05  |
| P49411 EFTU   | HUMAN | Elongation factor Tu, mitochondrial                                      | 2  | 0.81 | <0.01 |
| P49454 CENPF  | HUMAN | Centromere protein F                                                     | 5  | 1.10 | <0.01 |
| P49748 ACADV  | HUMAN | Very long-chain specific acyl-CoA dehydrogenase, mitochondrial           | 2  | 0.79 | <0.01 |
| P49750 YLPMP1 | HUMAN | YLP motif-containing protein 1                                           | 2  | 1.37 | 0.02  |
| P49756 RBM25  | HUMAN | RNA-binding protein 25                                                   | 2  | 1.00 | 0.73  |
| P49792 RBP2   | HUMAN | E3 SUMO-protein ligase RanBP2                                            | 2  | 0.80 | <0.01 |
| P49821 NDUV1  | HUMAN | NADH dehydrogenase [ubiquinone] flavoprotein 1, mitochondrial            | 5  | 0.86 | <0.01 |
| P50213 IDH3A  | HUMAN | Isocitrate dehydrogenase [NAD] subunit alpha, mitochondrial              | 5  | 0.88 | <0.01 |
| P50447 A1AT   | PIG   | Alpha-1-antitrypsin                                                      | 2  | 1.17 | <0.01 |
| P50454 SERPH  | HUMAN | Serpin H1                                                                | 3  | 1.06 | <0.01 |
| P50461 CSR3   | HUMAN | Cysteine and glycine-rich protein 3                                      | 3  | 1.66 | <0.01 |
| P50667 COX2   | PIG   | Cytochrome c oxidase subunit 2                                           | 3  | 0.81 | <0.01 |
| P50851 LRBA   | HUMAN | Lipopolysaccharide-responsive and beige-like anchor protein              | 4  | 0.94 | <0.01 |
| P50990 TCPQ   | HUMAN | T-complex protein 1 subunit theta                                        | 4  | 1.22 | <0.01 |
| P50993 AT1A2  | HUMAN | Sodium/potassium-transporting ATPase subunit alpha-2                     | 3  | 1.02 | 1.00  |
| P51148 RAB5C  | HUMAN | Ras-related protein Rab-5C                                               | 2  | 1.27 | <0.01 |
| P51553 IDH3G  | HUMAN | Isocitrate dehydrogenase [NAD] subunit gamma, mitochondrial              | 2  | 0.83 | <0.01 |
| P51587 BRCA2  | HUMAN | Breast cancer type 2 susceptibility protein                              | 5  | 1.01 | <0.01 |
| P51816 AFF2   | HUMAN | AF4/FMR2 family member 2                                                 | 3  | 0.97 | 0.22  |
| P51854 TKTL1  | HUMAN | Transketolase-like protein 1                                             | 2  | 1.13 | 0.37  |
| P51884 LUM    | HUMAN | Lumican                                                                  | 3  | 1.24 | <0.01 |
| P51888 PRELP  | HUMAN | Prolargin                                                                | 2  | 1.91 | <0.01 |
| P52179 MYOM1  | HUMAN | Myomesin-1                                                               | 8  | 0.80 | <0.01 |
| P52272 HNRPM  | HUMAN | Heterogeneous nuclear ribonucleoprotein M                                | 2  | 1.01 | <0.01 |
| P52552 PRDX2  | PIG   | Peroxiredoxin-2 (Fragment)                                               | 3  | 1.43 | <0.01 |
| P52565 GDIR1  | HUMAN | Rho GDP-dissociation inhibitor 1                                         | 3  | 1.09 | <0.01 |
| P52701 MSH6   | HUMAN | DNA mismatch repair protein Msh6                                         | 2  | 2.64 | <0.01 |
| P53590 SUCB2  | PIG   | Succinyl-CoA ligase [GDP-forming] subunit beta, mitochondrial (Fragment) | 5  | 0.70 | <0.01 |
| P53621 COPA   | HUMAN | Coatomer subunit alpha                                                   | 2  | 0.81 | 0.72  |
| P53675 CLH2   | HUMAN | Clathrin heavy chain 2                                                   | 2  | 1.27 | <0.01 |
| P54278 PMS2   | HUMAN | Mismatch repair endonuclease PMS2                                        | 3  | 0.95 | <0.01 |
| P54296 MYOM2  | HUMAN | Myomesin-2                                                               | 5  | 0.75 | <0.01 |
| P55084 ECHB   | HUMAN | Trifunctional enzyme subunit beta, mitochondrial                         | 5  | 1.05 | 0.77  |
| P55157 MTP    | HUMAN | Microsomal triglyceride transfer protein large subunit                   | 2  | 0.82 | 0.07  |
| P55196 AFAD   | HUMAN | Afadin                                                                   | 3  | 0.79 | <0.01 |
| P55290 CAD13  | HUMAN | Cadherin-13                                                              | 3  | 0.78 | <0.01 |
| P55931 ETFD   | PIG   | Electron transfer flavoprotein-ubiquinone oxidoreductase, mitochondrial  | 5  | 1.11 | <0.01 |
| P57772 SELB   | HUMAN | Selenocysteine-specific elongation factor                                | 4  | 1.11 | 0.72  |
| P58107 EPIPL  | HUMAN | Epiplakin                                                                | 3  | 1.05 | 0.95  |
| P60174 TPIS   | HUMAN | Triosephosphate isomerase                                                | 5  | 1.10 | <0.01 |
| P60660 MYL6   | HUMAN | Myosin light polypeptide 6                                               | 2  | 0.83 | <0.01 |
| P60709 ACTB   | HUMAN | Actin, cytoplasmic 1                                                     | 15 | 1.12 | <0.01 |
| P61019 RAB2A  | HUMAN | Ras-related protein Rab-2A                                               | 2  | 1.40 | <0.01 |
| P61026 RAB10  | HUMAN | Ras-related protein Rab-10                                               | 2  | 1.63 | <0.01 |
| P61088 UBE2N  | HUMAN | Ubiquitin-conjugating enzyme E2 N                                        | 3  | 1.02 | <0.01 |
| P61160 ARP2   | HUMAN | Actin-related protein 2                                                  | 2  | 1.54 | <0.01 |
| P61586 RHOA   | HUMAN | Transforming protein RhoA                                                | 2  | 0.91 | 0.43  |

|              |       |                                                                         |    |      |       |
|--------------|-------|-------------------------------------------------------------------------|----|------|-------|
| P61978 HNRPK | HUMAN | Heterogeneous nuclear ribonucleoprotein K                               | 5  | 1.60 | <0.01 |
| P61981 1433G | HUMAN | 14-3-3 protein gamma                                                    | 4  | 1.37 | <0.01 |
| P62140 PP1B  | HUMAN | Serine/threonine-protein phosphatase PP1-beta catalytic subunit         | 3  | 1.05 | <0.01 |
| P62258 1433E | HUMAN | 14-3-3 protein epsilon                                                  | 5  | 1.20 | <0.01 |
| P62263 RS14  | HUMAN | 40S ribosomal protein S14                                               | 2  | 0.60 | <0.01 |
| P62701 RS4X  | HUMAN | 40S ribosomal protein S4, X isoform                                     | 4  | 1.48 | <0.01 |
| P62805 H4    | HUMAN | Histone H4                                                              | 5  | 1.29 | <0.01 |
| P62834 RAP1A | HUMAN | Ras-related protein Rap-1A                                              | 2  | 1.23 | <0.01 |
| P62895 CYC   | PIG   | Cytochrome c                                                            | 4  | 0.86 | <0.01 |
| P62936 PPIA  | PIG   | Peptidyl-prolyl cis-trans isomerase A                                   | 3  | 2.26 | <0.01 |
| P63104 1433Z | HUMAN | 14-3-3 protein zeta/delta                                               | 5  | 1.27 | <0.01 |
| P63316 TNNC1 | HUMAN | Troponin C, slow skeletal and cardiac muscles                           | 4  | 0.87 | <0.01 |
| P67936 TPM4  | HUMAN | Tropomyosin alpha-4 chain                                               | 2  | 0.96 | 0.24  |
| P68032 ACTC  | HUMAN | Actin, alpha cardiac muscle 1                                           | 18 | 1.26 | <0.01 |
| P68363 TBA1B | HUMAN | Tubulin alpha-1B chain                                                  | 9  | 2.07 | <0.01 |
| P68366 TBA4A | HUMAN | Tubulin alpha-4A chain                                                  | 7  | 1.94 | <0.01 |
| P68371 TBB2C | HUMAN | Tubulin beta-2C chain                                                   | 14 | 1.64 | <0.01 |
| P78509 RELN  | HUMAN | Reelin                                                                  | 3  | 0.95 | 0.05  |
| P78527 PRKDC | HUMAN | DNA-dependent protein kinase catalytic subunit                          | 4  | 0.91 | <0.01 |
| P79263 ITIH4 | PIG   | Inter-alpha-trypsin inhibitor heavy chain H4                            | 3  | 0.43 | 0.47  |
| P79273 ACADS | PIG   | Short-chain specific acyl-CoA dehydrogenase, mitochondrial              | 2  | 0.76 | 0.01  |
| P79274 ACADL | PIG   | Long-chain specific acyl-CoA dehydrogenase, mitochondrial               | 8  | 0.75 | <0.01 |
| P79303 UGPA  | PIG   | UTP--glucose-1-phosphate uridylyltransferase                            | 3  | 1.28 | <0.01 |
| P79384 PCCB  | PIG   | Propionyl-CoA carboxylase beta chain, mitochondrial                     | 3  | 0.76 | <0.01 |
| P80031 GSTP1 | PIG   | Glutathione S-transferase P                                             | 3  | 1.18 | <0.01 |
| P80895 PIMT  | PIG   | Protein-L-isoaspartate(D-aspartate) O-methyltransferase                 | 2  | 0.83 | <0.01 |
| P80928 MIF   | PIG   | Macrophage migration inhibitory factor                                  | 2  | 1.49 | <0.01 |
| P82460 THIO  | PIG   | Thioredoxin                                                             | 2  | 1.81 | <0.01 |
| P83686 NB5R3 | PIG   | NADH-cytochrome b5 reductase 3 (Fragment)                               | 3  | 1.19 | <0.01 |
| P98160 PGBM  | HUMAN | Basement membrane-specific heparan sulfate proteoglycan core protein    | 3  | 0.98 | 0.34  |
| P98173 FAM3A | HUMAN | Protein FAM3A                                                           | 2  | 0.98 | 0.98  |
| Q00325 MPCP  | HUMAN | Phosphate carrier protein, mitochondrial                                | 4  | 0.97 | <0.01 |
| Q00610 CLH1  | HUMAN | Clathrin heavy chain 1                                                  | 5  | 1.34 | <0.01 |
| Q00688 FKBP3 | HUMAN | Peptidyl-prolyl cis-trans isomerase FKBP3                               | 3  | 1.39 | <0.01 |
| Q00722 PLCB2 | HUMAN | 1-phosphatidylinositol-4,5-bisphosphate phosphodiesterase beta-2        | 3  | 0.86 | 0.23  |
| Q00770 DHSB  | PIG   | Succinate dehydrogenase [ubiquinone] iron-sulfur subunit, mitochondrial | 2  | 0.84 | <0.01 |
| Q00839 HNRPU | HUMAN | Heterogeneous nuclear ribonucleoprotein U                               | 3  | 0.85 | <0.01 |
| Q00975 CAC1B | HUMAN | Voltage-dependent N-type calcium channel subunit alpha-1B               | 4  | 0.72 | <0.01 |
| Q01082 SPTB2 | HUMAN | Spectrin beta chain, brain 1                                            | 16 | 1.24 | <0.01 |
| Q01484 ANK2  | HUMAN | Ankyrin-2                                                               | 2  | 0.90 | 0.71  |
| Q01955 CO4A3 | HUMAN | Collagen alpha-3(IV) chain                                              | 2  | 0.63 | <0.01 |
| Q01968 OCRL  | HUMAN | Inositol polyphosphate 5-phosphatase OCRL-1                             | 2  | 1.01 | <0.01 |
| Q01970 PLCB3 | HUMAN | 1-phosphatidylinositol-4,5-bisphosphate phosphodiesterase beta-3        | 2  | 0.76 | 0.05  |
| Q01995 TAGL  | HUMAN | Transgelin                                                              | 3  | 1.75 | <0.01 |
| Q02218 ODO1  | HUMAN | 2-oxoglutarate dehydrogenase, mitochondrial                             | 12 | 0.96 | <0.01 |
| Q02224 CENPE | HUMAN | Centromere-associated protein E                                         | 9  | 0.97 | <0.01 |
| Q02252 MMSA  | HUMAN | Methylmalonate-semialdehyde dehydrogenase [acylating], mitochondrial    | 2  | 0.61 | <0.01 |
| Q02338 BDH   | HUMAN | D-beta-hydroxybutyrate dehydrogenase, mitochondrial                     | 3  | 0.82 | <0.01 |
| Q02388 CO7A1 | HUMAN | Collagen alpha-1(VII) chain                                             | 4  | 0.96 | 0.40  |

|              |       |                                                                                |    |      |       |
|--------------|-------|--------------------------------------------------------------------------------|----|------|-------|
| Q02846 GUC2D | HUMAN | Retinal guanylyl cyclase 1                                                     | 2  | 1.37 | 0.09  |
| Q02880 TOP2B | HUMAN | DNA topoisomerase 2-beta<br>Mitochondrial 2-                                   | 4  | 0.93 | 0.06  |
| Q02978 M2OM  | HUMAN | oxoglutarate/malate carrier<br>protein                                         | 3  | 1.07 | <0.01 |
| Q03001 BPA1  | HUMAN | Bullous pemphigoid antigen 1                                                   | 2  | 0.67 | <0.01 |
| Q03164 MLL1  | HUMAN | Histone-lysine N-<br>methyltransferase MLL                                     | 6  | 0.99 | 0.79  |
| Q04917 1433F | HUMAN | 14-3-3 protein eta                                                             | 3  | 1.28 | <0.01 |
| Q04967 HSP76 | PIG   | Heat shock 70 kDa protein 6                                                    | 7  | 1.19 | <0.01 |
| Q05329 DCE2  | HUMAN | Glutamate decarboxylase 2                                                      | 2  | 1.03 | <0.01 |
| Q05397 FAK1  | HUMAN | Focal adhesion kinase 1                                                        | 2  | 0.87 | 0.01  |
| Q05639 EF1A2 | HUMAN | Elongation factor 1-alpha 2                                                    | 9  | 1.32 | <0.01 |
| Q05682 CALD1 | HUMAN | Caldesmon                                                                      | 2  | 1.51 | <0.01 |
| Q05707 COEA1 | HUMAN | Collagen alpha-1(XIV) chain                                                    | 2  | 0.94 | 0.60  |
| Q06323 PSME1 | HUMAN | Proteasome activator<br>complex subunit 1                                      | 2  | 1.62 | <0.01 |
| Q06828 FMOD  | HUMAN | Fibromodulin                                                                   | 2  | 1.45 | 0.29  |
| Q06830 PRDX1 | HUMAN | Peroxiredoxin-1                                                                | 2  | 1.52 | <0.01 |
| Q07864 DPOE1 | HUMAN | DNA polymerase epsilon<br>catalytic subunit A                                  | 4  | 0.91 | 0.13  |
| Q07954 LRP1  | HUMAN | Prolow-density lipoprotein<br>receptor-related protein 1                       | 3  | 0.88 | <0.01 |
| Q08211 DHX9  | HUMAN | ATP-dependent RNA helicase<br>A                                                | 4  | 0.88 | <0.01 |
| Q08AD1 CAMP2 | HUMAN | Calmodulin-regulated spectrin-<br>associated protein 2                         | 3  | 1.44 | 0.02  |
| Q09161 NCBP1 | HUMAN | Nuclear cap-binding protein<br>subunit 1                                       | 2  | 1.55 | 0.01  |
| Q09666 AHNK  | HUMAN | Neuroblast differentiation-<br>associated protein AHNK                         | 30 | 1.09 | <0.01 |
| Q09MP3 R51A2 | HUMAN | RAD51-associated protein 2                                                     | 3  | 0.87 | 0.14  |
| Q0MVN8 QOR   | PIG   | Quinone oxidoreductase                                                         | 3  | 0.84 | 0.01  |
| Q0QF01 DHSA  | PIG   | Succinate dehydrogenase<br>[ubiquinone] flavoprotein<br>subunit, mitochondrial | 4  | 0.85 | <0.01 |
| Q0VDD8 DYH14 | HUMAN | Dynein heavy chain 14,<br>axonemal                                             | 10 | 0.81 | <0.01 |
| Q12802 AKP13 | HUMAN | A-kinase anchor protein 13                                                     | 6  | 1.21 | <0.01 |
| Q12830 BPTF  | HUMAN | Nucleosome-remodeling<br>factor subunit BPTF                                   | 6  | 0.89 | 0.02  |
| Q12851 M4K2  | HUMAN | Mitogen-activated protein<br>kinase kinase kinase kinase 2                     | 3  | 1.16 | 0.82  |
| Q12873 CHD3  | HUMAN | Chromodomain-helicase-DNA-<br>binding protein 3                                | 5  | 1.00 | 0.12  |
| Q12913 PTPRJ | HUMAN | Receptor-type tyrosine-<br>protein phosphatase eta                             | 2  | 0.57 | 0.67  |
| Q12931 TRAP1 | HUMAN | Heat shock protein 75 kDa,<br>mitochondrial                                    | 2  | 1.33 | <0.01 |
| Q12955 ANK3  | HUMAN | Ankyrin-3                                                                      | 9  | 1.00 | <0.01 |
| Q12959 DLG1  | HUMAN | Disks large homolog 1                                                          | 3  | 1.03 | 0.51  |
| Q13029 PRDM2 | HUMAN | PR domain zinc finger protein<br>2                                             | 7  | 0.88 | <0.01 |
| Q13085 ACACA | HUMAN | Acetyl-CoA carboxylase 1                                                       | 2  | 1.18 | <0.01 |
| Q13099 IFT88 | HUMAN | Intraflagellar transport<br>protein 88 homolog                                 | 5  | 1.13 | 0.17  |
| Q13136 LIPA1 | HUMAN | Liprin-alpha-1                                                                 | 2  | 1.35 | <0.01 |
| Q13162 PRDX4 | HUMAN | Peroxiredoxin-4                                                                | 2  | 0.91 | <0.01 |
| Q13367 AP3B2 | HUMAN | AP-3 complex subunit beta-2                                                    | 3  | 0.95 | 0.49  |
| Q13393 PLD1  | HUMAN | Phospholipase D1                                                               | 3  | 1.13 | 0.03  |
| Q13423 NNTM  | HUMAN | NAD(P) transhydrogenase,<br>mitochondrial                                      | 12 | 0.89 | <0.01 |
| Q13428 TCOF  | HUMAN | Treacle protein                                                                | 3  | 1.00 | 0.95  |
| Q13438 OS9   | HUMAN | Protein-9                                                                      | 2  | 0.83 | <0.01 |
| Q13439 GOGA4 | HUMAN | Golgin subfamily A member 4                                                    | 6  | 0.93 | <0.01 |
| Q13523 PRP4B | HUMAN | Serine/threonine-protein<br>kinase PRP4 homolog                                | 2  | 1.17 | 0.18  |
| Q13554 KCC2B | HUMAN | Calcium/calmodulin-<br>dependent protein kinase<br>type II subunit beta        | 5  | 1.03 | 0.12  |
| Q13557 KCC2D | HUMAN | Calcium/calmodulin-<br>dependent protein kinase<br>type II subunit delta       | 7  | 1.09 | 0.07  |
| Q13642 FHL1  | HUMAN | Four and a half LIM domains<br>protein 1                                       | 5  | 1.36 | <0.01 |
| Q13698 CAC1S | HUMAN | Voltage-dependent L-type<br>calcium channel subunit alpha-<br>1S               | 2  | 1.20 | 0.42  |
| Q13796 SHRM2 | HUMAN | Protein Shroom2                                                                | 2  | 1.06 | 0.07  |
| Q13813 SPTA2 | HUMAN | Spectrin alpha chain, brain                                                    | 17 | 1.05 | <0.01 |
| Q13873 BMPR2 | HUMAN | Bone morphogenetic protein<br>receptor type-2                                  | 2  | 0.90 | <0.01 |
| Q14004 CDK13 | HUMAN | Cell division protein kinase 13                                                | 3  | 1.04 | 0.98  |
| Q14008 CKAP5 | HUMAN | Cytoskeleton-associated<br>protein 5                                           | 9  | 0.94 | 0.03  |
| Q14028 CNGB1 | HUMAN | Cyclic nucleotide-gated cation<br>channel beta-1                               | 2  | 0.93 | 0.02  |
| Q14160 SCRIB | HUMAN | Protein scribble homolog                                                       | 3  | 1.11 | 0.31  |

|               |       |                                                                             |    |      |       |
|---------------|-------|-----------------------------------------------------------------------------|----|------|-------|
| Q14191 WRN    | HUMAN | Werner syndrome ATP-dependent helicase                                      | 2  | 1.20 | 0.45  |
| Q14195 DPYL3  | HUMAN | Dihydropyrimidinase-related protein 3                                       | 7  | 1.60 | <0.01 |
| Q14204 DYHC1  | HUMAN | Cytoplasmic dynein 1 heavy chain 1                                          | 5  | 1.06 | <0.01 |
| Q14240 IF4A2  | HUMAN | Eukaryotic initiation factor 4A-II                                          | 3  | 1.34 | <0.01 |
| Q14315 FLNC   | HUMAN | Filamin-C                                                                   | 37 | 1.69 | <0.01 |
| Q14524 SCN5A  | HUMAN | Sodium channel protein type 5 subunit alpha                                 | 2  | 0.86 | 0.21  |
| Q14573 ITPR3  | HUMAN | Inositol 1,4,5-trisphosphate receptor type 3                                | 2  | 0.89 | 0.32  |
| Q14667 K0100  | HUMAN | UPF0378 protein KIAA0100                                                    | 3  | 0.90 | 0.81  |
| Q14683 SMC1A  | HUMAN | Structural maintenance of chromosomes protein 1A                            | 5  | 1.08 | <0.01 |
| Q14690 RRP5   | HUMAN | Protein RRP5 homolog                                                        | 5  | 0.85 | 0.13  |
| Q14789 GOGGB1 | HUMAN | Golgin subfamily B member 1                                                 | 3  | 0.76 | 0.04  |
| Q14833 GRM4   | HUMAN | Metabotropic glutamate receptor 4                                           | 2  | 1.00 | 1.00  |
| Q14839 CHD4   | HUMAN | Chromodomain-helicase-DNA-binding protein 4                                 | 6  | 0.92 | 0.77  |
| Q14896 MYPC3  | HUMAN | Myosin-binding protein C, cardiac-type                                      | 17 | 0.78 | <0.01 |
| Q14978 NOLC1  | HUMAN | Nucleolar and coiled-body phosphoprotein 1                                  | 2  | 0.93 | 0.81  |
| Q14993 COJA1  | HUMAN | Collagen alpha-1(XIX) chain                                                 | 2  | 0.91 | 0.56  |
| Q149N8 SHPRH  | HUMAN | E3 ubiquitin-protein ligase SHPRH                                           | 2  | 0.90 | 0.25  |
| Q14CM0 FRPD4  | HUMAN | FERM and PDZ domain-containing protein 4                                    | 2  | 0.85 | 0.01  |
| Q15032 R3HD1  | HUMAN | R3H domain-containing protein 1                                             | 2  | 1.02 | 0.77  |
| Q15124 PGM5   | HUMAN | Phosphoglucomutase-like protein 5                                           | 4  | 1.22 | <0.01 |
| Q15147 PLCB4  | HUMAN | 1-phosphatidylinositol-4,5-bisphosphate phosphodiesterase beta-4            | 2  | 1.14 | 0.01  |
| Q15149 PLEC   | HUMAN | Plectin                                                                     | 16 | 1.17 | <0.01 |
| Q15365 PCBP1  | HUMAN | Poly(rC)-binding protein 1                                                  | 3  | 1.68 | <0.01 |
| Q15366 PCBP2  | HUMAN | Poly(rC)-binding protein 2                                                  | 2  | 1.30 | <0.01 |
| Q15404 RSU1   | HUMAN | Ras suppressor protein 1                                                    | 2  | 1.27 | <0.01 |
| Q15413 RYSR3  | HUMAN | Ryanodine receptor 3                                                        | 6  | 0.79 | <0.01 |
| Q15648 MED1   | HUMAN | Mediator of RNA polymerase II transcription subunit 1                       | 2  | 1.18 | 0.17  |
| Q15652 JHD2C  | HUMAN | Probable JmjC domain-containing histone demethylation protein 2C            | 6  | 0.84 | <0.01 |
| Q15746 MYLK   | HUMAN | Myosin light chain kinase, smooth muscle                                    | 2  | 1.21 | 0.07  |
| Q15772 SPEG   | HUMAN | Striated muscle preferentially expressed protein kinase                     | 6  | 1.23 | <0.01 |
| Q16082 HSPB2  | HUMAN | Heat shock protein beta-2                                                   | 2  | 1.61 | <0.01 |
| Q16478 GRIK5  | HUMAN | Glutamate receptor, ionotropic kainate 5                                    | 2  | 1.05 | 0.88  |
| Q16555 DPYL2  | HUMAN | Dihydropyrimidinase-related protein 2                                       | 4  | 1.34 | <0.01 |
| Q16720 AT2B3  | HUMAN | Plasma membrane calcium-transporting ATPase 3                               | 2  | 0.74 | 0.11  |
| Q16795 NDUA9  | HUMAN | NADH dehydrogenase [ubiquinone] 1 alpha subcomplex subunit 9, mitochondrial | 3  | 1.03 | <0.01 |
| Q16891 IMMT   | HUMAN | Mitochondrial inner membrane protein                                        | 2  | 0.85 | <0.01 |
| Q17RC7 CN073  | HUMAN | SEC6-like protein C14orf73                                                  | 2  | 0.83 | 0.04  |
| Q19AZ8 THRB   | PIG   | Prothrombin                                                                 | 3  | 1.05 | 0.23  |
| Q1KYTO ENOB   | PIG   | Beta-enolase                                                                | 9  | 1.30 | <0.01 |
| Q1MSJ5 CSPP1  | HUMAN | Centrosome and spindle pole-associated protein 1                            | 3  | 1.14 | <0.01 |
| Q28938 IL12B  | PIG   | Interleukin-12 subunit beta                                                 | 3  | 1.32 | <0.01 |
| Q28943 DPYD   | PIG   | Dihydropyrimidine dehydrogenase [NADP+]                                     | 2  | 0.79 | <0.01 |
| Q28983 ZAN    | PIG   | Zonadhesin                                                                  | 9  | 1.02 | <0.01 |
| Q29092 ENPL   | PIG   | Endoplasmic                                                                 | 11 | 1.19 | <0.01 |
| Q29315 RLA2   | PIG   | 60S acidic ribosomal protein P2                                             | 3  | 1.74 | <0.01 |
| Q29380 VDAC3  | PIG   | Voltage-dependent anion-selective channel protein 3                         | 3  | 0.99 | <0.01 |
| Q29551 SCOT1  | PIG   | Succinyl-CoA:3-ketoacid-coenzyme A transferase 1, mitochondrial             | 8  | 0.91 | <0.01 |
| Q29554 ECHA   | PIG   | Trifunctional enzyme subunit alpha, mitochondrial                           | 15 | 1.01 | 0.44  |
| Q2EN76 NDKB   | PIG   | Nucleoside diphosphate kinase B                                             | 4  | 1.33 | <0.01 |
| Q2EN81 ATPO   | PIG   | ATP synthase subunit O, mitochondrial                                       | 5  | 0.98 | <0.01 |

|              |       |                                                                              |    |      |       |
|--------------|-------|------------------------------------------------------------------------------|----|------|-------|
| Q2HYU2 K6PF  | PIG   | 6-phosphofructokinase, muscle type                                           | 13 | 1.31 | <0.01 |
| Q2KJY2 KI26B | HUMAN | Kinesin-like protein KIF26B                                                  | 3  | 0.85 | 0.05  |
| Q2MJV9 PALMD | PIG   | Palmelphin                                                                   | 2  | 1.02 | 0.78  |
| Q2NL82 TSR1  | HUMAN | Pre-rRNA-processing protein TSR1 homolog                                     | 2  | 0.95 | 0.75  |
| Q32P41 TRMT5 | HUMAN | tRNA (guanine-N(1)-methyltransferase                                         | 2  | 1.09 | 0.75  |
| Q35914 ATP8  | PIG   | ATP synthase protein 8                                                       | 2  | 0.58 | 1.00  |
| Q38SD2 LRRK1 | HUMAN | Leucine-rich repeat serine/threonine-protein kinase 1                        | 3  | 0.92 | 0.06  |
| Q3T8J9 GON4L | HUMAN | GON-4-like protein                                                           | 2  | 0.85 | 0.09  |
| Q3V6T2 GRDN  | HUMAN | Girdin                                                                       | 3  | 0.95 | <0.01 |
| Q3ZD69 LMNA  | PIG   | Prelamin-A/C                                                                 | 8  | 1.24 | <0.01 |
| Q460N5 PAR14 | HUMAN | Poly [ADP-ribose] polymerase 14                                              | 3  | 0.88 | <0.01 |
| Q49I35 LEG1  | PIG   | Galectin-1                                                                   | 2  | 0.92 | <0.01 |
| Q4G0P3 HYDIN | HUMAN | Hydrocephalus-inducing protein homolog                                       | 3  | 0.77 | <0.01 |
| Q4KWH8 PLCH1 | HUMAN | 1-phosphatidylinositol-4,5-bisphosphate phosphodiesterase eta-1              | 2  | 1.06 | 0.78  |
| Q4ZHG4 FNDC1 | HUMAN | Fibronectin type III domain-containing protein 1                             | 2  | 0.88 | 0.17  |
| Q52I78 NAMPT | PIG   | Nicotinamide phosphoribosyltransferase                                       | 2  | 1.00 | 1.00  |
| Q56P28 PRAF3 | PIG   | PRA1 family protein 3                                                        | 2  | 1.19 | <0.01 |
| Q5CZC0 FSIP2 | HUMAN | Fibrous sheath-interacting protein 2                                         | 10 | 0.94 | <0.01 |
| Q5D891 PK3C3 | PIG   | Phosphatidylinositol 3-kinase catalytic subunit type 3                       | 5  | 0.90 | 0.12  |
| Q5FZP5 SCG2  | PIG   | Secretogranin-2                                                              | 3  | 1.54 | <0.01 |
| Q5GN48 DMD   | PIG   | Dystrophin                                                                   | 13 | 1.06 | <0.01 |
| Q5JR59 MTUS2 | HUMAN | Microtubule-associated tumor suppressor candidate 2                          | 3  | 0.84 | 0.07  |
| Q5JRA6 MIA3  | HUMAN | Melanoma inhibitory activity protein 3                                       | 3  | 0.89 | 0.55  |
| Q5ISL3 DOC11 | HUMAN | Dedicator of cytokinesis protein 11                                          | 3  | 0.96 | 0.77  |
| Q5JV73 FRPD3 | HUMAN | FERM and PDZ domain-containing protein 3                                     | 3  | 1.28 | <0.01 |
| Q5K651 SAMD9 | HUMAN | Sterile alpha motif domain-containing protein 9                              | 2  | 1.25 | <0.01 |
| Q5M9N0 CD158 | HUMAN | Coiled-coil domain-containing protein 158                                    | 4  | 0.95 | 0.35  |
| Q5PXT2 LMCD1 | PIG   | LIM and cysteine-rich domains protein 1                                      | 4  | 0.80 | <0.01 |
| Q5S1U1 HSPB1 | PIG   | Heat shock protein beta-1                                                    | 11 | 1.54 | <0.01 |
| Q5SYB0 FRPD1 | HUMAN | FERM and PDZ domain-containing protein 1                                     | 2  | 1.32 | 0.06  |
| Q5SYE7 NHSL1 | HUMAN | NHS-like protein 1                                                           | 2  | 0.84 | 0.28  |
| Q5T200 ZC3HD | HUMAN | Zinc finger CCCH domain-containing protein 13                                | 7  | 0.94 | 0.34  |
| Q5T5P2 SKT   | HUMAN | Sickle tail protein homolog                                                  | 5  | 1.07 | 0.10  |
| Q5T7N2 LITD1 | HUMAN | LINE-1 type transposase domain-containing protein 1                          | 2  | 1.12 | 0.65  |
| Q5T8P6 RBM26 | HUMAN | RNA-binding protein 26                                                       | 2  | 0.81 | 0.62  |
| Q5TAX3 TUT4  | HUMAN | Terminal uridylyltransferase 4                                               | 4  | 0.87 | <0.01 |
| Q5TBA9 FRY   | HUMAN | Protein furry homolog                                                        | 6  | 0.93 | <0.01 |
| Q5TCQ9 MAGI3 | HUMAN | Membrane-associated guanylate kinase, WW and PDZ domain-containing protein 3 | 2  | 0.82 | 0.04  |
| Q5TCY1 TTBK1 | HUMAN | Tau-tubulin kinase 1                                                         | 2  | 0.73 | 0.05  |
| Q5TCZ1 SPD2A | HUMAN | SH3 and PX domain-containing protein 2A                                      | 7  | 1.03 | 0.06  |
| Q5THJ4 VP13D | HUMAN | Vacuolar protein sorting-associated protein 13D                              | 6  | 0.91 | <0.01 |
| Q5TZA2 CROCC | HUMAN | Rootletin                                                                    | 2  | 0.84 | <0.01 |
| Q5UIP0 RIF1  | HUMAN | Telomere-associated protein RIF1                                             | 3  | 0.88 | <0.01 |
| Q5VST9 OBSCN | HUMAN | Obscurin                                                                     | 4  | 1.00 | 0.01  |
| Q5VTE0 EF1A3 | HUMAN | Putative elongation factor 1-alpha-like 3                                    | 7  | 1.51 | <0.01 |
| Q5VTT5 MYOM3 | HUMAN | Myomesin-3                                                                   | 7  | 0.71 | <0.01 |
| Q5VU97 CAHD1 | HUMAN | VWFA and cache domain-containing protein 1                                   | 2  | 0.78 | 0.01  |
| Q5VZ66 JKIP3 | HUMAN | Janus kinase and microtubule-interacting protein 3                           | 2  | 1.10 | 0.84  |
| Q5VZE5 NAA35 | HUMAN | N-alpha-acetyltransferase 35, NatC auxiliary subunit                         | 3  | 1.39 | <0.01 |
| Q5VZK9 LR16A | HUMAN | Leucine-rich repeat-containing protein 16A                                   | 4  | 1.03 | 0.04  |
| Q5XLD3 KCRM  | PIG   | Creatine kinase M-type                                                       | 16 | 0.95 | <0.01 |
| Q63HN8 RN213 | HUMAN | RING finger protein 213                                                      | 3  | 0.92 | 0.44  |

|              |       |                                                                     |    |      |       |
|--------------|-------|---------------------------------------------------------------------|----|------|-------|
| Q66GS9 CP135 | HUMAN | Centrosomal protein of 135 kDa                                      | 2  | 0.90 | 0.01  |
| Q68D51 DEN2C | HUMAN | DENN domain-containing protein 2C                                   | 3  | 1.06 | 0.05  |
| Q6F5E8 LR16C | HUMAN | Leucine-rich repeat-containing protein 16C                          | 3  | 1.45 | 0.01  |
| Q6IQ23 PKHA7 | HUMAN | Pleckstrin homology domain-containing family A member 7             | 2  | 0.96 | 0.63  |
| Q6KB66 K2C80 | HUMAN | Keratin, type II cytoskeletal 80                                    | 3  | 1.30 | <0.01 |
| Q6KC79 NIPBL | HUMAN | Nipped-B-like protein                                               | 5  | 1.04 | 0.01  |
| Q6NZI2 PTRF  | HUMAN | Polymerase I and transcript release factor                          | 4  | 1.03 | <0.01 |
| Q6PJF5 RHDF2 | HUMAN | Rhomboid family member 2                                            | 2  | 0.84 | 0.91  |
| Q6PLK3 AOFB  | PIG   | Amine oxidase [flavin-containing] B                                 | 3  | 0.99 | 0.71  |
| Q6PQD5 ATM   | PIG   | Serine-protein kinase ATM                                           | 8  | 0.97 | <0.01 |
| Q6Q759 SPG17 | HUMAN | Sperm-associated antigen 17                                         | 3  | 0.96 | 0.85  |
| Q6Q7I2 GDIB  | PIG   | Rab GDP dissociation inhibitor beta                                 | 7  | 0.85 | <0.01 |
| Q6R327 RICTR | HUMAN | Rapamycin-insensitive companion of mTOR                             | 2  | 1.30 | 0.12  |
| Q6RVA9 CAV1  | PIG   | Caveolin-1                                                          | 2  | 1.07 | 0.93  |
| Q6S4N2 HS71B | PIG   | Heat shock 70 kDa protein 1B                                        | 10 | 1.67 | <0.01 |
| Q6S8J3 POTEE | HUMAN | POTE ankyrin domain family member E                                 | 8  | 1.20 | <0.01 |
| Q6UAQ8 ETFB  | PIG   | Electron transfer flavoprotein subunit beta                         | 6  | 1.08 | <0.01 |
| Q6UB99 ANR11 | HUMAN | Ankyrin repeat domain-containing protein 11                         | 6  | 1.16 | <0.01 |
| Q6UWP2 DHR11 | HUMAN | Dehydrogenase/reductase SDR family member 11                        | 2  | 1.21 | <0.01 |
| Q6VAB6 KSR2  | HUMAN | Kinase suppressor of Ras 2                                          | 3  | 0.56 | <0.01 |
| Q6W2J9 BCOR  | HUMAN | BCL-6 corepressor                                                   | 3  | 1.21 | 0.16  |
| Q6ZMN7 PZRN4 | HUMAN | PDZ domain-containing RING finger protein 4                         | 2  | 0.71 | <0.01 |
| Q6ZMW3 EMAL6 | HUMAN | Echinoderm microtubule-associated protein-like 6                    | 2  | 0.91 | 0.12  |
| Q6ZN30 BNC2  | HUMAN | Zinc finger protein basonuclin-2                                    | 4  | 1.03 | 0.99  |
| Q6ZQQ6 WDR87 | HUMAN | WD repeat-containing protein 87                                     | 3  | 0.81 | 0.01  |
| Q6ZQY3 GADL1 | HUMAN | Glutamate decarboxylase-like protein 1                              | 2  | 0.86 | 0.27  |
| Q6ZR08 DYH12 | HUMAN | Dynein heavy chain 12, axonemal                                     | 3  | 1.10 | 0.26  |
| Q702N8 XIRP1 | HUMAN | Xin actin-binding repeat-containing protein 1                       | 7  | 1.33 | <0.01 |
| Q709C8 VP13C | HUMAN | Vacuolar protein sorting-associated protein 13C                     | 5  | 0.98 | 0.39  |
| Q70CQ2 UBP34 | HUMAN | Ubiquitin carboxyl-terminal hydrolase 34                            | 2  | 0.82 | 0.11  |
| Q70E73 RAPH1 | HUMAN | Ras-associated and pleckstrin homology domains-containing protein 1 | 4  | 0.82 | 0.03  |
| Q71DI3 H32   | HUMAN | Histone H3.2                                                        | 2  | 1.08 | <0.01 |
| Q71F56 MD13L | HUMAN | Mediator of RNA polymerase II transcription subunit 13-like         | 2  | 0.60 | <0.01 |
| Q76N89 HECW1 | HUMAN | E3 ubiquitin-protein ligase HECW1                                   | 2  | 1.77 | <0.01 |
| Q7LBC6 KDM3B | HUMAN | Lysine-specific demethylase 3B                                      | 5  | 1.20 | 0.07  |
| Q7M2W6 CRYAB | PIG   | Alpha-crystallin B chain                                            | 5  | 2.28 | <0.01 |
| Q7SIB7 PGK1  | PIG   | Phosphoglycerate kinase 1                                           | 12 | 1.21 | <0.01 |
| Q7Z2Z2 ETUD1 | HUMAN | Elongation factor Tu GTP-binding domain-containing protein 1        | 2  | 1.00 | 0.23  |
| Q7Z406 MYH14 | HUMAN | Myosin-14                                                           | 3  | 1.15 | <0.01 |
| Q7Z443 PK1L3 | HUMAN | Polycystic kidney disease protein 1-like 3                          | 3  | 0.90 | <0.01 |
| Q7Z460 CLAP1 | HUMAN | CLIP-associating protein 1                                          | 6  | 0.90 | <0.01 |
| Q7Z478 DHX29 | HUMAN | ATP-dependent RNA helicase DHX29                                    | 2  | 0.75 | 0.01  |
| Q7Z4H7 HAUS6 | HUMAN | HAUS augmin-like complex subunit 6                                  | 4  | 0.87 | <0.01 |
| Q7Z5J8 ANKAR | HUMAN | Ankyrin and armadillo repeat-containing protein                     | 2  | 0.84 | <0.01 |
| Q7Z5P9 MUC19 | HUMAN | Mucin-19                                                            | 2  | 0.47 | 0.06  |
| Q7Z6E9 RBBP6 | HUMAN | E3 ubiquitin-protein ligase RBBP6                                   | 4  | 1.12 | <0.01 |
| Q7Z7A1 CP110 | HUMAN | Centriolin                                                          | 2  | 0.78 | 0.38  |
| Q7Z7G8 VP13B | HUMAN | Vacuolar protein sorting-associated protein 13B                     | 5  | 0.79 | <0.01 |
| Q863Z0 PSME2 | PIG   | Proteasome activator complex subunit 2                              | 2  | 0.79 | <0.01 |

|              |       |                                                                     |    |      |       |
|--------------|-------|---------------------------------------------------------------------|----|------|-------|
| Q865U8 ANKR1 | PIG   | Ankyrin repeat domain-containing protein 1                          | 2  | 1.86 | <0.01 |
| Q86SQ0 PHLB2 | HUMAN | Pleckstrin homology-like domain family B member 2                   | 4  | 1.26 | <0.01 |
| Q86TC9 MYPN  | HUMAN | Myopalladin                                                         | 2  | 1.15 | <0.01 |
| Q86TD4 SRCA  | HUMAN | Sarcalumenin                                                        | 7  | 0.83 | <0.01 |
| Q86U86 PB1   | HUMAN | Protein polybromo-1                                                 | 2  | 0.87 | 0.76  |
| Q86UK5 LBN   | HUMAN | Limbin                                                              | 4  | 0.95 | 0.02  |
| Q86UP2 KTN1  | HUMAN | Kinectin                                                            | 4  | 1.47 | <0.01 |
| Q86VF7 NRAP  | HUMAN | Nebulin-related-anchoring protein                                   | 4  | 1.04 | 0.18  |
| Q86VI3 IQGA3 | HUMAN | Ras GTPase-activating-like protein IQGAP3                           | 3  | 0.72 | <0.01 |
| Q86VS8 HOOK3 | HUMAN | Protein Hook homolog 3                                              | 3  | 0.90 | 0.03  |
| Q86VV8 RTTN  | HUMAN | Rotatin                                                             | 2  | 1.48 | <0.01 |
| Q86WG5 MTMRD | HUMAN | Myotubularin-related protein 13                                     | 3  | 0.98 | 0.33  |
| Q86WI3 NLRC5 | HUMAN | Protein NLRC5                                                       | 3  | 1.25 | <0.01 |
| Q86WN1 FCSO1 | HUMAN | FCH and double SH3 domains protein 1                                | 2  | 1.21 | 0.78  |
| Q86YN6 PRGC2 | HUMAN | Peroxisome proliferator-activated receptor gamma coactivator 1-beta | 2  | 0.83 | 0.01  |
| Q8IUD2 RB6I2 | HUMAN | ELKS/Rab6-interacting/CAST family member 1                          | 2  | 0.99 | 0.88  |
| Q8IUG5 MY18B | HUMAN | Myosin-XVIIIb                                                       | 8  | 0.92 | <0.01 |
| Q8IVF2 AHNK2 | HUMAN | Protein AHNK2                                                       | 9  | 0.89 | 0.03  |
| Q8IVF4 DYH10 | HUMAN | Dynein heavy chain 10, axonemal                                     | 3  | 0.77 | <0.01 |
| Q8IVL0 NAV3  | HUMAN | Neuron navigator 3                                                  | 4  | 1.15 | <0.01 |
| Q8IVL1 NAV2  | HUMAN | Neuron navigator 2                                                  | 9  | 1.03 | <0.01 |
| Q8IVW4 CDKL3 | HUMAN | Cyclin-dependent kinase-like 3                                      | 2  | 1.12 | 0.23  |
| Q8IWA6 CCD60 | HUMAN | Coiled-coil domain-containing protein 60                            | 4  | 1.12 | <0.01 |
| Q8IWB9 TEX2  | HUMAN | Testis-expressed sequence 2 protein                                 | 3  | 1.49 | 0.03  |
| Q8IWC1 MA7D3 | HUMAN | MAP7 domain-containing protein 3                                    | 2  | 0.79 | 0.02  |
| Q8IWV9 MGAP  | HUMAN | MAX gene-associated protein                                         | 6  | 0.94 | 0.07  |
| Q8IX01 SFR14 | HUMAN | Putative splicing factor, arginine/serine-rich 14                   | 3  | 1.15 | 0.08  |
| Q8IX21 F178A | HUMAN | Protein FAM178A                                                     | 2  | 1.28 | 0.06  |
| Q8IY92 SLX4  | HUMAN | Structure-specific endonuclease subunit SLX4                        | 6  | 0.95 | 0.89  |
| Q8IYA2 C144C | HUMAN | Coiled-coil domain-containing protein 144C                          | 2  | 0.94 | 0.77  |
| Q8IYB3 SRRM1 | HUMAN | Serine/arginine repetitive matrix protein 1                         | 6  | 1.12 | <0.01 |
| Q8IYD8 FANCM | HUMAN | Fanconi anemia group M protein                                      | 2  | 0.74 | 0.19  |
| Q8IYY4 DZ11L | HUMAN | Zinc finger protein DZIP1L                                          | 2  | 0.81 | 0.07  |
| Q8IZC6 CORA1 | HUMAN | Collagen alpha-1(XVII) chain                                        | 3  | 1.04 | 0.04  |
| Q8IZF6 GP112 | HUMAN | Probable G-protein coupled receptor 112                             | 5  | 1.32 | <0.01 |
| Q8IZT6 ASPM  | HUMAN | Abnormal spindle-like microcephaly-associated protein               | 5  | 1.20 | 0.01  |
| Q8MJ14 GPX1  | PIG   | Glutathione peroxidase 1                                            | 4  | 1.63 | <0.01 |
| Q8MJ76 FETA  | PIG   | Alpha-fetoprotein                                                   | 2  | 0.86 | 0.10  |
| Q8N3CO HELC1 | HUMAN | Activating signal cointegrator 1 complex subunit 3                  | 3  | 1.10 | <0.01 |
| Q8N3K9 CMYA5 | HUMAN | Cardiomyopathy-associated protein 5                                 | 5  | 0.88 | 0.01  |
| Q8N3V7 SYNPO | HUMAN | Synaptopodin                                                        | 2  | 0.97 | 0.12  |
| Q8N3X1 FNBP4 | HUMAN | Formin-binding protein 4                                            | 3  | 1.03 | 0.09  |
| Q8N7P1 PLD5  | HUMAN | Inactive phospholipase D5                                           | 2  | 1.10 | 0.95  |
| Q8N7X0 CAN7L | HUMAN | Calpain-7-like protein                                              | 3  | 1.01 | 1.00  |
| Q8NB12 SMYD1 | HUMAN | SET and MYND domain-containing protein 1                            | 2  | 1.10 | 0.24  |
| Q8NBF2 NHLC2 | HUMAN | NHL repeat-containing protein 2                                     | 2  | 1.27 | 0.01  |
| Q8NCM8 DYHC2 | HUMAN | Cytoplasmic dynein 2 heavy chain 1                                  | 4  | 0.98 | 0.08  |
| Q8NDW8 TT21A | HUMAN | Tetratricopeptide repeat protein 21A                                | 2  | 0.98 | 0.32  |
| Q8NE18 NSUN7 | HUMAN | Putative methyltransferase NSUN7                                    | 4  | 0.79 | 0.01  |
| Q8NEF3 CC112 | HUMAN | Coiled-coil domain-containing protein 112                           | 2  | 1.31 | <0.01 |
| Q8NEY1 NAV1  | HUMAN | Neuron navigator 1                                                  | 12 | 0.97 | <0.01 |
| Q8NF91 SYNE1 | HUMAN | Nesprin-1                                                           | 15 | 1.04 | <0.01 |
| Q8NFC6 BOD1L | HUMAN | Biorientation of chromosomes in cell division protein 1-like        | 3  | 1.06 | 0.75  |
| Q8NFW1 COMA1 | HUMAN | Collagen alpha-1(XXII) chain                                        | 2  | 1.53 | 0.05  |
| Q8NG31 CASC5 | HUMAN | Protein CASC5                                                       | 5  | 0.96 | 0.21  |
| Q8NHV3 GA2L2 | HUMAN | GAS2-like protein 2                                                 | 2  | 0.89 | <0.01 |



|               |       |                                                               |    |      |       |
|---------------|-------|---------------------------------------------------------------|----|------|-------|
| Q8NI27 THOC2  | HUMAN | THO complex subunit 2                                         | 3  | 0.89 | <0.01 |
| Q8SP57 HPT    | PIG   | Haptoglobin                                                   | 3  | 0.30 | 0.15  |
| Q8TC29 ENKUR  | HUMAN | Enkurin                                                       | 2  | 0.57 | <0.01 |
| Q8TC99 FNDC8  | HUMAN | Fibronectin type III domain-containing protein 8              | 2  | 1.10 | 0.52  |
| Q8TD26 CHD6   | HUMAN | Chromodomain-helicase-DNA-binding protein 6                   | 2  | 1.40 | 0.03  |
| Q8TD57 DYH3   | HUMAN | Dynein heavy chain 3, axonemal                                | 6  | 0.84 | <0.01 |
| Q8TDI0 CHD5   | HUMAN | Chromodomain-helicase-DNA-binding protein 5                   | 5  | 1.08 | 0.83  |
| Q8TDJ6 DMXL2  | HUMAN | DmX-like protein 2                                            | 6  | 1.03 | <0.01 |
| Q8TDM6 DLG5   | HUMAN | Disks large homolog 5                                         | 2  | 1.18 | 0.16  |
| Q8TDQ7 GNPI2  | HUMAN | Glucosamine-6-phosphate isomerase 2                           | 2  | 1.65 | <0.01 |
| Q8TDW5 SYTL5  | HUMAN | Synaptotagmin-like protein 5                                  | 2  | 0.77 | 0.01  |
| Q8TDX9 PK1L1  | HUMAN | Polycystic kidney disease protein 1-like 1                    | 5  | 1.18 | <0.01 |
| Q8TE49 OTU7A  | HUMAN | OTU domain-containing protein 7A                              | 4  | 1.25 | <0.01 |
| Q8TE73 DYH5   | HUMAN | Dynein heavy chain 5, axonemal                                | 6  | 1.15 | <0.01 |
| Q8TE82 S3TC1  | HUMAN | SH3 domain and tetratricopeptide repeats-containing protein 1 | 2  | 0.79 | 0.74  |
| Q8WNV7 DHRS4  | PIG   | Dehydrogenase/reductase SDR family member 4                   | 3  | 1.79 | <0.01 |
| Q8WNV3 PLAK   | PIG   | Junction plakoglobin                                          | 2  | 1.11 | 0.04  |
| Q8WUY9 DEP1B  | HUMAN | DEP domain-containing protein 1B                              | 3  | 1.11 | 0.01  |
| Q8WWL7 CCNB3  | HUMAN | G2/mitotic-specific cyclin-B3                                 | 2  | 0.69 | 0.10  |
| Q8WWQ8 STAB2  | HUMAN | Stabilin-2                                                    | 3  | 0.91 | 0.07  |
| Q8WXH0 SYNE2  | HUMAN | Nesprin-2                                                     | 2  | 1.27 | 0.50  |
| Q8WXI7 MUC16  | HUMAN | Mucin-16                                                      | 4  | 0.85 | <0.01 |
| Q8WXR4 MYO3B  | HUMAN | Myosin-IIlb                                                   | 2  | 1.59 | 0.04  |
| Q8WXW3 PIBF1  | HUMAN | Progesterone-induced-blocking factor 1                        | 3  | 0.86 | 0.06  |
| Q8WXX0 DYH7   | HUMAN | Dynein heavy chain 7, axonemal                                | 3  | 0.74 | <0.01 |
| Q8WYP5 ELYS   | HUMAN | Protein ELYS                                                  | 5  | 1.17 | 0.07  |
| Q8WYQ5 DGCR8  | HUMAN | Microprocessor complex subunit DGCR8                          | 2  | 0.74 | 0.44  |
| Q8WZ42 TITIN  | HUMAN | Titin                                                         | 52 | 1.01 | <0.01 |
| Q92499 DDX1   | HUMAN | ATP-dependent RNA helicase DDX1                               | 2  | 1.08 | 0.63  |
| Q92523 CPT1B  | HUMAN | Carnitine O-palmitoyltransferase 1, muscle isoform            | 2  | 0.71 | <0.01 |
| Q92539 LPIN2  | HUMAN | Phosphatidate phosphatase LPIN2                               | 2  | 1.16 | 0.12  |
| Q92614 MY18A  | HUMAN | Myosin-XVIIIa                                                 | 4  | 1.16 | 0.09  |
| Q92736 RYSR2  | HUMAN | Ryanodine receptor 2                                          | 3  | 1.21 | 0.05  |
| Q92804 RBP56  | HUMAN | TATA-binding protein-associated factor 2N                     | 4  | 0.65 | <0.01 |
| Q92833 JARID2 | HUMAN | Protein Jumonji                                               | 2  | 0.85 | 0.19  |
| Q92841 DDX17  | HUMAN | Probable ATP-dependent RNA helicase DDX17                     | 2  | 1.01 | 0.02  |
| Q92974 ARHG2  | HUMAN | Rho guanine nucleotide exchange factor 2                      | 2  | 1.60 | <0.01 |
| Q95339 ATPK   | PIG   | ATP synthase subunit f, mitochondrial                         | 2  | 0.93 | 0.69  |
| Q96AC1 FERM2  | HUMAN | Fermitin family homolog 2                                     | 2  | 1.15 | <0.01 |
| Q96AY4 TTC28  | HUMAN | Tetratricopeptide repeat protein 28                           | 4  | 0.85 | <0.01 |
| Q96DT5 DYH11  | HUMAN | Dynein heavy chain 11, axonemal                               | 6  | 0.96 | 0.03  |
| Q96G01 BICD1  | HUMAN | Protein bicaudal D homolog 1                                  | 2  | 0.76 | <0.01 |
| Q96GP6 SREC2  | HUMAN | Scavenger receptor class F member 2                           | 2  | 1.00 | <0.01 |
| Q96HC4 PDLI5  | HUMAN | PDZ and LIM domain protein 5                                  | 4  | 0.98 | 0.76  |
| Q96HJ3 CCD34  | HUMAN | Coiled-coil domain-containing protein 34                      | 2  | 1.16 | 0.04  |
| Q96JB1 DYH8   | HUMAN | Dynein heavy chain 8, axonemal                                | 8  | 0.95 | 0.05  |
| Q96JE9 MAP6   | HUMAN | Microtubule-associated protein 6                              | 2  | 0.92 | 0.63  |
| Q96J7 SPTCS   | HUMAN | Spatacsin                                                     | 2  | 0.96 | 0.42  |
| Q96JM7 LMBL3  | HUMAN | Lethal(3)malignant brain tumor-like protein 3                 | 3  | 0.89 | 0.04  |
| Q96JN8 NEUL4  | HUMAN | Neuralized-like protein 4                                     | 3  | 1.02 | 0.02  |
| Q96JQ0 PCD16  | HUMAN | Protocadherin-16                                              | 2  | 1.03 | <0.01 |
| Q96L93 KIF16B | HUMAN | Kinesin-like protein KIF16B                                   | 3  | 0.93 | <0.01 |
| Q96MC2 CB039  | HUMAN | UPF0407 protein C2orf39                                       | 3  | 1.19 | 0.05  |
| Q96MR6 WDR65  | HUMAN | WD repeat-containing protein 65                               | 3  | 1.15 | 0.13  |
| Q96N16 JKIP1  | HUMAN | Janus kinase and microtubule-interacting protein 1            | 3  | 0.83 | 0.02  |

|              |       |                                                                 |   |      |       |
|--------------|-------|-----------------------------------------------------------------|---|------|-------|
| Q96P44 COLA1 | HUMAN | Collagen alpha-1(XI) chain                                      | 2 | 1.10 | 0.27  |
| Q96PK2 MACF4 | HUMAN | Microtubule-actin cross-linking factor 1, isoform 4             | 7 | 1.24 | <0.01 |
| Q96PN6 ADCYA | HUMAN | Adenylate cyclase type 10                                       | 3 | 0.83 | 0.06  |
| Q96PV7 F193B | HUMAN | Protein FAM193B                                                 | 3 | 0.97 | 0.41  |
| Q96PY5 FMNL2 | HUMAN | Formin-like protein 2                                           | 4 | 0.68 | <0.01 |
| Q96Q04 LMTK3 | HUMAN | Serine/threonine-protein kinase LMTK3                           | 2 | 0.98 | 0.98  |
| Q96Q15 SMG1  | HUMAN | Serine/threonine-protein kinase SMG1                            | 3 | 0.85 | 0.08  |
| Q96Q89 KI20B | HUMAN | Kinesin-like protein KIF20B                                     | 3 | 1.11 | 0.16  |
| Q96QE3 ATAD5 | HUMAN | ATPase family AAA domain-containing protein 5                   | 6 | 0.93 | 0.35  |
| Q96R06 SPAG5 | HUMAN | Sperm-associated antigen 5                                      | 4 | 0.95 | 0.75  |
| Q96RL7 VP13A | HUMAN | Vacuolar protein sorting-associated protein 13A                 | 2 | 1.51 | <0.01 |
| Q96RW7 HMCN1 | HUMAN | Hemicentin-1                                                    | 2 | 0.87 | 0.36  |
| Q96RY7 IF140 | HUMAN | Intraflagellar transport protein 140 homolog                    | 2 | 0.99 | 0.54  |
| Q96SB4 SRPK1 | HUMAN | Serine/threonine-protein kinase SRPK1                           | 2 | 1.79 | 0.01  |
| Q96T58 MINT  | HUMAN | Msx2-interacting protein Nicotinamide                           | 9 | 0.97 | 0.02  |
| Q96T66 NMNA3 | HUMAN | mononucleotide adenylyltransferase 3                            | 2 | 0.81 | 0.32  |
| Q99028 COMT  | PIG   | Catechol O-methyltransferase (Fragment)                         | 3 | 1.35 | <0.01 |
| Q99259 DCE1  | HUMAN | Glutamate decarboxylase 1                                       | 2 | 0.77 | 0.03  |
| Q99457 NP1L3 | HUMAN | Nucleosome assembly protein 1-like 3                            | 2 | 1.11 | 0.58  |
| Q99460 PSMD1 | HUMAN | 26S proteasome non-ATPase regulatory subunit 1                  | 2 | 0.98 | 0.15  |
| Q99497 PARK7 | HUMAN | Protein DJ-1                                                    | 3 | 1.05 | 1.00  |
| Q99623 PHB2  | HUMAN | Prohibitin-2                                                    | 5 | 1.06 | 0.15  |
| Q99698 LYST  | HUMAN | Lysosomal-trafficking regulator                                 | 2 | 1.29 | 0.01  |
| Q99715 COCA1 | HUMAN | Collagen alpha-1(XII) chain                                     | 5 | 0.93 | <0.01 |
| Q99880 H2B1L | HUMAN | Histone H2B type 1-L                                            | 4 | 1.12 | <0.01 |
| Q99959 PKP2  | HUMAN | Plakophilin-2                                                   | 5 | 1.12 | <0.01 |
| Q99996 AKAP9 | HUMAN | A-kinase anchor protein 9                                       | 2 | 0.97 | 0.76  |
| Q9BDY8 ANGP1 | PIG   | Angiotensinogen 1                                               | 2 | 0.78 | 0.02  |
| Q9BQ69 MACD1 | HUMAN | MACRO domain-containing protein 1                               | 3 | 1.01 | <0.01 |
| Q9BQE3 TBA1C | HUMAN | Tubulin alpha-1C chain                                          | 9 | 2.00 | <0.01 |
| Q9BQI7 PSD2  | HUMAN | PH and SEC7 domain-containing protein 2                         | 3 | 1.00 | 0.79  |
| Q9BSF8 BTBDA | HUMAN | BTB/POZ domain-containing protein 10                            | 2 | 0.92 | <0.01 |
| Q9BTC0 DIDO1 | HUMAN | Death-inducer obliterator 1                                     | 3 | 1.14 | 0.02  |
| Q9BVG3 TRI62 | HUMAN | Tripartite motif-containing protein 62                          | 3 | 0.95 | 0.27  |
| Q9BX26 SYCP2 | HUMAN | Synaptonemal complex protein 2                                  | 4 | 0.88 | 0.50  |
| Q9BX63 FANCI | HUMAN | Fanconi anemia group J protein                                  | 4 | 0.85 | 0.01  |
| Q9BX66 SRBS1 | HUMAN | Sorbin and SH3 domain-containing protein 1                      | 5 | 1.00 | 0.16  |
| Q9BXM0 PRAX  | HUMAN | Periaxin                                                        | 2 | 1.10 | 0.04  |
| Q9BXN1 ASPN  | HUMAN | Asporin                                                         | 4 | 1.59 | <0.01 |
| Q9BXT5 TEX15 | HUMAN | Testis-expressed sequence 15 protein                            | 4 | 0.89 | <0.01 |
| Q9BXT6 M10L1 | HUMAN | Putative helicase Mov10L1                                       | 3 | 0.95 | 0.12  |
| Q9BXX3 AN30A | HUMAN | Ankyrin repeat domain-containing protein 30A                    | 3 | 1.42 | <0.01 |
| Q9BYW2 SETD2 | HUMAN | Histone-lysine N-methyltransferase SETD2                        | 4 | 0.94 | <0.01 |
| Q9BZ29 DOCK9 | HUMAN | Dedicator of cytokinesis protein 9                              | 4 | 0.96 | 0.98  |
| Q9C000 NALP1 | HUMAN | NACHT, LRR and PYD domains-containing protein 1                 | 2 | 0.94 | 0.10  |
| Q9C091 GRB1L | HUMAN | GREB1-like protein                                              | 6 | 1.18 | 0.01  |
| Q9C099 LRCC1 | HUMAN | Leucine-rich repeat and coiled-coil domain-containing protein 1 | 3 | 0.93 | 0.66  |
| Q9C0F0 ASXL3 | HUMAN | Putative Polycomb group protein ASXL3                           | 2 | 1.43 | 0.01  |
| Q9C0G6 DYH6  | HUMAN | Dynein heavy chain 6, axonemal                                  | 6 | 1.05 | <0.01 |
| Q9C0I9 LRC27 | HUMAN | Leucine-rich repeat-containing protein 27                       | 2 | 1.14 | <0.01 |
| Q9GJT2 ESTD  | PIG   | S-formylglutathione hydrolase                                   | 2 | 1.04 | 0.97  |
| Q9GKQ6 PGS1  | PIG   | Biglycan (Fragments)                                            | 2 | 2.90 | <0.01 |
| Q9GL51 LIS1  | PIG   | Platelet-activating factor acetylhydrolase 1B subunit alpha     | 2 | 1.19 | 0.01  |

|              |       |                                                                                                                  |   |      |       |
|--------------|-------|------------------------------------------------------------------------------------------------------------------|---|------|-------|
| Q9GZU2 PEG3  | HUMAN | Paternally-expressed gene 3 protein                                                                              | 3 | 0.70 | <0.01 |
| Q9H082 RB33B | HUMAN | Ras-related protein Rab-33B                                                                                      | 2 | 1.53 | <0.01 |
| Q9H251 CAD23 | HUMAN | Cadherin-23                                                                                                      | 2 | 1.06 | 0.29  |
| Q9H2D6 TARA  | HUMAN | TRIO and F-actin-binding protein                                                                                 | 4 | 1.08 | <0.01 |
| Q9H2G2 SLK   | HUMAN | STE20-like serine/threonine-protein kinase                                                                       | 3 | 0.89 | 0.01  |
| Q9H2S9 IKZF4 | HUMAN | Zinc finger protein Eos                                                                                          | 2 | 0.95 | 0.85  |
| Q9H3U1 UN45A | HUMAN | Protein unc-45 homolog A                                                                                         | 3 | 1.12 | 0.26  |
| Q9H4G0 E41L1 | HUMAN | Band 4.1-like protein 1                                                                                          | 2 | 1.36 | 0.06  |
| Q9H4M7 PKHA4 | HUMAN | Pleckstrin homology domain-containing family A member 4                                                          | 2 | 1.32 | 0.19  |
| Q9H583 HEAT1 | HUMAN | HEAT repeat-containing protein 1                                                                                 | 4 | 0.92 | <0.01 |
| Q9H5Y7 SLIK6 | HUMAN | SLIT and NTRK-like protein 6                                                                                     | 2 | 0.99 | 0.99  |
| Q9H792 SG269 | HUMAN | Tyrosine-protein kinase SgK269                                                                                   | 2 | 0.56 | 0.30  |
| Q9H7B2 RPF2  | HUMAN | Ribosome production factor 2 homolog                                                                             | 2 | 0.77 | 0.15  |
| Q9H987 SYP2L | HUMAN | Synaptopodin 2-like protein                                                                                      | 4 | 1.36 | <0.01 |
| Q9HAR2 LPHN3 | HUMAN | Latrophilin-3                                                                                                    | 2 | 1.06 | 0.06  |
| Q9HAV4 XPO5  | HUMAN | Exportin-5                                                                                                       | 2 | 1.33 | <0.01 |
| Q9HBE1 PATZ1 | HUMAN | POZ-, AT hook-, and zinc finger-containing protein 1                                                             | 3 | 0.81 | 0.03  |
| Q9HC35 EMAL4 | HUMAN | Echinoderm microtubule-associated protein-like 4                                                                 | 2 | 0.89 | 0.03  |
| Q9HC77 CENPJ | HUMAN | Centromere protein J                                                                                             | 6 | 1.23 | <0.01 |
| Q9HCB6 SPON1 | HUMAN | Spondin-1                                                                                                        | 3 | 1.10 | 0.45  |
| Q9HD23 MRS2  | HUMAN | Magnesium transporter MRS2 homolog, mitochondrial                                                                | 3 | 1.11 | <0.01 |
| Q9HD67 MYO10 | HUMAN | Myosin-X                                                                                                         | 4 | 0.99 | 0.25  |
| Q9HDC5 JPH1  | HUMAN | Junctophilin-1                                                                                                   | 3 | 0.88 | 0.30  |
| Q9MZ15 VDAC2 | PIG   | Voltage-dependent anion-selective channel protein 2                                                              | 8 | 1.04 | <0.01 |
| Q9MZ16 VDAC1 | PIG   | Voltage-dependent anion-selective channel protein 1                                                              | 8 | 1.01 | <0.01 |
| Q9N0F1 ODO2  | PIG   | Dihydrolipoyllysine-residue succinyltransferase component of 2-oxoglutarate dehydrogenase complex, mitochondrial | 5 | 0.85 | <0.01 |
| Q9NPC6 MYOZ2 | HUMAN | Myozenin-2                                                                                                       | 3 | 0.79 | <0.01 |
| Q9NPF5 DMAP1 | HUMAN | DNA methyltransferase 1-associated protein 1                                                                     | 3 | 0.89 | <0.01 |
| Q9NQ66 PLCB1 | HUMAN | 1-phosphatidylinositol-4,5-bisphosphate phosphodiesterase beta-1                                                 | 2 | 0.95 | 0.08  |
| Q9NQC3 RTN4  | HUMAN | Reticulon-4                                                                                                      | 3 | 1.37 | <0.01 |
| Q9NR30 DDX21 | HUMAN | Nucleolar RNA helicase 2                                                                                         | 2 | 1.37 | <0.01 |
| Q9NR82 KCNQ5 | HUMAN | Potassium voltage-gated channel subfamily KQT member 5                                                           | 2 | 0.93 | 0.11  |
| Q9NR96 TLR9  | HUMAN | Toll-like receptor 9                                                                                             | 3 | 0.87 | <0.01 |
| Q9NRC6 SPTN5 | HUMAN | Spectrin beta chain, brain 4                                                                                     | 5 | 1.04 | 0.81  |
| Q9NRL2 BAZ1A | HUMAN | Bromodomain adjacent to zinc finger domain protein 1A                                                            | 2 | 0.94 | 0.65  |
| Q9NRM1 ENAM  | HUMAN | Enamelin                                                                                                         | 4 | 0.97 | 0.03  |
| Q9NSI6 BRWD1 | HUMAN | Bromodomain and WD repeat-containing protein 1                                                                   | 4 | 0.92 | 0.02  |
| Q9NTI5 PDS5B | HUMAN | Sister chromatid cohesion protein PDS5 homolog B                                                                 | 3 | 0.71 | 0.27  |
| Q9NTJ3 SMC4  | HUMAN | Structural maintenance of chromosomes protein 4                                                                  | 3 | 1.00 | 0.04  |
| Q9NTK5 OLA1  | HUMAN | Obg-like ATPase 1                                                                                                | 3 | 0.78 | 0.16  |
| Q9NU22 MDN1  | HUMAN | Midasin                                                                                                          | 3 | 0.86 | <0.01 |
| Q9NUA8 ZBT40 | HUMAN | Zinc finger and BTB domain-containing protein 40                                                                 | 2 | 1.03 | 0.22  |
| Q9NUB1 ACS2L | HUMAN | Acetyl-coenzyme A synthetase 2-like, mitochondrial                                                               | 4 | 0.91 | 0.63  |
| Q9NVM9 M89BB | HUMAN | Cell cycle regulator Mat89Bb homolog                                                                             | 2 | 1.02 | 0.98  |
| Q9NWH9 SLTM  | HUMAN | SAFB-like transcription modulator                                                                                | 2 | 0.97 | 0.85  |
| Q9NX45 SOLH2 | HUMAN | Spermatogenesis- and oogenesis-specific basic helix-loop-helix-containing protein 2                              | 3 | 0.77 | <0.01 |
| Q9NX63 CHCH3 | HUMAN | Coiled-coil-helix-coiled-coil-helix domain-containing protein 3, mitochondrial                                   | 2 | 0.98 | 0.75  |
| Q9NXD2 MTMRA | HUMAN | Myotubularin-related protein 10                                                                                  | 2 | 0.85 | 0.33  |
| Q9NY65 TBA8  | HUMAN | Tubulin alpha-8 chain                                                                                            | 6 | 1.33 | <0.01 |
| Q9NYB9 ABI2  | HUMAN | Abl interactor 2                                                                                                 | 2 | 0.75 | <0.01 |

|              |       |                                                              |    |      |       |
|--------------|-------|--------------------------------------------------------------|----|------|-------|
| Q9NYC9 DYH9  | HUMAN | Dynein heavy chain 9, axonemal                               | 5  | 1.02 | 0.05  |
| Q9NYQ7 CELR3 | HUMAN | Cadherin EGF LAG seven-pass G-type receptor 3                | 2  | 0.71 | <0.01 |
| Q9NYQ8 FAT2  | HUMAN | Protocadherin Fat 2                                          | 2  | 1.09 | 0.41  |
| Q9NYU1 UGGG2 | HUMAN | UDP-glucose:glycoprotein glucosyltransferase 2               | 3  | 0.81 | 0.01  |
| Q9NYU2 UGGG1 | HUMAN | UDP-glucose:glycoprotein glucosyltransferase 1               | 3  | 0.85 | 0.28  |
| Q9NZ52 GGA3  | HUMAN | ADP-ribosylation factor-binding protein GGA3                 | 2  | 1.68 | <0.01 |
| Q9NZJ4 SACS  | HUMAN | Sacsin                                                       | 6  | 0.94 | 0.36  |
| Q9NZJ5 E2AK3 | HUMAN | Eukaryotic translation initiation factor 2-alpha kinase 3    | 2  | 0.81 | 0.26  |
| Q9NZJ6 COQ3  | HUMAN | Hexaprenyldihydroxybenzoate methyltransferase, mitochondrial | 2  | 0.86 | <0.01 |
| Q9NZM1 MYOF  | HUMAN | Myoferlin                                                    | 4  | 0.95 | 0.22  |
| Q9NZN4 EHD2  | HUMAN | EH domain-containing protein 2                               | 2  | 1.34 | <0.01 |
| Q9P0L2 MARK1 | HUMAN | Serine/threonine-protein kinase MARK1                        | 3  | 0.90 | 0.44  |
| Q9P203 BTBD7 | HUMAN | BTB/POZ domain-containing protein 7                          | 2  | 0.72 | <0.01 |
| Q9P219 DAPLE | HUMAN | Protein Daple                                                | 3  | 0.70 | <0.01 |
| Q9P225 DYH2  | HUMAN | Dynein heavy chain 2, axonemal                               | 5  | 0.81 | <0.01 |
| Q9P227 RHG23 | HUMAN | Rho GTPase-activating protein 23                             | 4  | 1.01 | <0.01 |
| Q9P281 BAHC1 | HUMAN | BAH and coiled-coil domain-containing protein 1              | 3  | 0.92 | 0.66  |
| Q9P2D7 DYH1  | HUMAN | Dynein heavy chain 1, axonemal                               | 3  | 1.71 | <0.01 |
| Q9P2D8 UNC79 | HUMAN | Protein unc-79 homolog                                       | 3  | 0.94 | 0.89  |
| Q9P2K1 C2D2A | HUMAN | Coiled-coil and C2 domain-containing protein 2A              | 2  | 0.83 | <0.01 |
| Q9P2P1 NYNRI | HUMAN | Protein NYNRIN                                               | 3  | 0.88 | 0.30  |
| Q9P2P6 STAR9 | HUMAN | StAR-related lipid transfer protein 9                        | 4  | 0.73 | <0.01 |
| Q9TDR1 NU5M  | PIG   | NADH-ubiquinone oxidoreductase chain 5                       | 2  | 0.88 | 0.19  |
| Q9TSX9 PRDX6 | PIG   | Peroxiredoxin-6                                              | 5  | 0.83 | <0.01 |
| Q9UBF9 MYOTI | HUMAN | Myotilin                                                     | 3  | 1.11 | <0.01 |
| Q9UBU7 DBF4A | HUMAN | Protein DBF4 homolog A                                       | 2  | 0.84 | 0.42  |
| Q9UBY9 HSPB7 | HUMAN | Heat shock protein beta-7                                    | 2  | 1.28 | <0.01 |
| Q9UFH2 DYH17 | HUMAN | Dynein heavy chain 17, axonemal                              | 5  | 0.86 | <0.01 |
| Q9UH99 SUN2  | HUMAN | SUN domain-containing protein 2                              | 2  | 0.77 | <0.01 |
| Q9UHB6 LIMA1 | HUMAN | LIM domain and actin-binding protein 1                       | 2  | 1.39 | 0.05  |
| Q9UHC1 MLH3  | HUMAN | DNA mismatch repair protein Mlh3                             | 4  | 1.21 | 0.16  |
| Q9UHL0 DDX25 | HUMAN | ATP-dependent RNA helicase DDX25                             | 2  | 1.12 | 0.79  |
| Q9UHP3 UBP25 | HUMAN | Ubiquitin carboxyl-terminal hydrolase 25                     | 3  | 0.96 | 0.04  |
| Q9UIF8 BAZ2B | HUMAN | Bromodomain adjacent to zinc finger domain protein 2B        | 4  | 0.91 | <0.01 |
| Q9UIG0 BAZ1B | HUMAN | Tyrosine-protein kinase BAZ1B                                | 2  | 0.84 | 0.06  |
| Q9UIW2 PLXA1 | HUMAN | Plexin-A1                                                    | 4  | 1.20 | <0.01 |
| Q9UJS0 CMC2  | HUMAN | Calcium-binding mitochondrial carrier protein Aralar2        | 4  | 0.88 | <0.01 |
| Q9UKL3 C8AP2 | HUMAN | CASP8-associated protein 2                                   | 7  | 0.93 | 0.05  |
| Q9UKN7 MYO15 | HUMAN | Myosin-XV                                                    | 5  | 0.95 | <0.01 |
| Q9UKV0 HDAC9 | HUMAN | Histone deacetylase 9                                        | 2  | 1.68 | <0.01 |
| Q9UKX2 MYH2  | HUMAN | Myosin-2                                                     | 21 | 0.85 | <0.01 |
| Q9UKX3 MYH13 | HUMAN | Myosin-13                                                    | 15 | 0.81 | <0.01 |
| Q9UKX5 ITA11 | HUMAN | Integrin alpha-11                                            | 2  | 0.87 | 0.40  |
| Q9ULK0 GRID1 | HUMAN | Glutamate receptor delta-1 subunit                           | 3  | 0.90 | 0.46  |
| Q9UM54 MYO6  | HUMAN | Myosin-VI                                                    | 4  | 0.76 | <0.01 |
| Q9UMS6 SYNP2 | HUMAN | Synaptopodin-2                                               | 4  | 1.07 | <0.01 |
| Q9UMZ3 PTPRQ | HUMAN | Phosphatidylinositol phosphatase PTPRQ                       | 2  | 0.99 | 0.07  |
| Q9UNS1 TIM   | HUMAN | Protein timeless homolog                                     | 2  | 1.42 | 0.19  |
| Q9UPA5 BSN   | HUMAN | Protein bassoon                                              | 3  | 1.10 | <0.01 |
| Q9UPP1 PHF8  | HUMAN | Histone lysine demethylase PHF8                              | 4  | 0.88 | 0.10  |
| Q9UPX0 TUTLB | HUMAN | Protein turtle homolog B                                     | 3  | 1.14 | 0.04  |
| Q9UQ26 RIMS2 | HUMAN | Regulating synaptic membrane exocytosis protein 2            | 6  | 1.01 | 0.69  |
| Q9XSD9 PGS2  | PIG   | Decorin                                                      | 3  | 0.88 | 0.02  |
| Q9Y210 TRPC6 | HUMAN | Short transient receptor potential channel 6                 | 2  | 1.14 | 0.94  |

|              |       |                                                               |    |      |       |
|--------------|-------|---------------------------------------------------------------|----|------|-------|
| Q9Y235 ABEC2 | HUMAN | Probable C->U-editing enzyme APOBEC-2                         | 2  | 1.00 | 1.00  |
| Q9Y281 COF2  | HUMAN | Cofilin-2                                                     | 3  | 1.30 | <0.01 |
| Q9Y2H5 PKHA6 | HUMAN | Pleckstrin homology domain-containing family A member 6       | 9  | 0.92 | <0.01 |
| Q9Y2H9 MAST1 | HUMAN | Microtubule-associated serine/threonine-protein kinase 1      | 2  | 0.84 | 0.10  |
| Q9Y2I6 NINL  | HUMAN | Ninein-like protein                                           | 4  | 1.01 | 0.28  |
| Q9Y2J2 E41L3 | HUMAN | Band 4.1-like protein 3                                       | 2  | 0.99 | 0.07  |
| Q9Y2J8 PADI2 | HUMAN | Protein-arginine deiminase type-2                             | 2  | 1.33 | 0.14  |
| Q9Y2X3 NOP58 | HUMAN | Nucleolar protein 58                                          | 2  | 1.13 | 0.33  |
| Q9Y3P9 RBGP1 | HUMAN | Rab GTPase-activating protein 1                               | 2  | 0.97 | 0.74  |
| Q9Y490 TLN1  | HUMAN | Talin-1                                                       | 3  | 1.28 | <0.01 |
| Q9Y4B6 VPRBP | HUMAN | Protein VPRBP                                                 | 2  | 0.87 | 0.09  |
| Q9Y4C8 RBM19 | HUMAN | Probable RNA-binding protein 19                               | 2  | 0.94 | <0.01 |
| Q9Y4D8 K0614 | HUMAN | Probable E3 ubiquitin-protein ligase C12orf51                 | 3  | 0.94 | 0.06  |
| Q9Y4F1 FARP1 | HUMAN | FERM, RhoGEF and pleckstrin domain-containing protein 1       | 5  | 1.11 | 0.04  |
| Q9Y4F4 F179B | HUMAN | Protein FAM179B                                               | 4  | 0.83 | 0.16  |
| Q9Y4G6 TLN2  | HUMAN | Talin-2                                                       | 4  | 1.13 | <0.01 |
| Q9Y4G8 RPGF2 | HUMAN | Rap guanine nucleotide exchange factor 2                      | 3  | 1.00 | 0.42  |
| Q9Y4K1 AIM1  | HUMAN | Absent in melanoma 1 protein                                  | 2  | 0.81 | <0.01 |
| Q9Y4W6 AFG32 | HUMAN | AFG3-like protein 2                                           | 2  | 1.01 | 0.07  |
| Q9Y520 BA2L2 | HUMAN | Protein BAT2-like 2                                           | 5  | 1.08 | <0.01 |
| Q9Y5K6 CD2AP | HUMAN | CD2-associated protein                                        | 3  | 0.98 | 0.85  |
| Q9Y5L4 TIM13 | HUMAN | Mitochondrial import inner membrane translocase subunit Tim13 | 2  | 1.07 | 0.68  |
| Q9Y5W8 SNX13 | HUMAN | Sorting nexin-13                                              | 2  | 0.72 | <0.01 |
| Q9Y618 NCOR2 | HUMAN | Nuclear receptor corepressor 2                                | 4  | 0.82 | <0.01 |
| Q9Y623 MYH4  | HUMAN | Myosin-4                                                      | 19 | 0.83 | <0.01 |
| Q9Y6R6 Z780B | HUMAN | Zinc finger protein 780B                                      | 2  | 1.29 | 0.07  |
| Q9Y6W3 CAN7  | HUMAN | Calpain-7                                                     | 3  | 0.85 | 0.08  |
| Q9Y6X0 SETBP | HUMAN | SET-binding protein                                           | 2  | 0.67 | <0.01 |
| Q9Y6X9 MORC2 | HUMAN | MORC family CW-type zinc finger protein 2                     | 4  | 0.93 | 0.01  |
| Q9YNA8 GAK3  | HUMAN | HERV-K_19q12 provirus ancestral Gag polyprotein               | 4  | 0.83 | <0.01 |

SI Table 2. Dysregulated proteins in hibernating animals vs. sham

| Accession ID                | Species | Protein Name                                                                | Ratio (HIB vs. Sham) |
|-----------------------------|---------|-----------------------------------------------------------------------------|----------------------|
| <b>Metabolism(35)</b>       |         |                                                                             |                      |
| P26440                      | HUMAN   | Isovaleryl-CoA dehydrogenase, mitochondrial                                 | 0.55                 |
| Q02252                      | HUMAN   | Methylmalonate-semialdehyde dehydrogenase [acylating], mitochondrial        | 0.61                 |
| P53590                      | PIG     | Succinyl-CoA ligase [GDP-forming] subunit beta, mitochondrial               | 0.70                 |
| Q92523                      | HUMAN   | Carnitine O-palmitoyltransferase 1, muscle isoform                          | 0.71                 |
| P11177                      | HUMAN   | Pyruvate dehydrogenase E1 component subunit beta, mitochondrial             | 0.72                 |
| P22695                      | HUMAN   | Cytochrome b-c1 complex subunit 2, mitochondrial                            | 0.72                 |
| P19404                      | HUMAN   | NADH dehydrogenase [ubiquinone] flavoprotein 2, mitochondrial               | 0.73                 |
| P07954                      | HUMAN   | Fumarate hydratase, mitochondrial                                           | 0.74                 |
| O75038                      | HUMAN   | 1-phosphatidylinositol-4,5-bisphosphate phosphodiesterase eta-2             | 0.74                 |
| P29804                      | PIG     | Pyruvate dehydrogenase E1 component subunit alpha, somatic form, mitochondr | 0.74                 |
| P24298                      | HUMAN   | Alanine aminotransferase 1                                                  | 0.74                 |
| P79274                      | PIG     | Long-chain specific acyl-CoA dehydrogenase, mitochondrial                   | 0.75                 |
| P79384                      | PIG     | Propionyl-CoA carboxylase beta chain, mitochondrial                         | 0.76                 |
| P00346                      | PIG     | Malate dehydrogenase, mitochondrial                                         | 0.76                 |
| P79273                      | PIG     | Short-chain specific acyl-CoA dehydrogenase, mitochondrial                  | 0.76                 |
| P0C7P4                      | HUMAN   | Putative cytochrome b-c1 complex subunit Rieske-like protein 1              | 0.78                 |
| O75306                      | HUMAN   | NADH dehydrogenase [ubiquinone] iron-sulfur protein 2, mitochondrial        | 0.78                 |
| Q8NE18                      | HUMAN   | Putative methyltransferase NSUN7                                            | 0.79                 |
| P49748                      | HUMAN   | Very long-chain specific acyl-CoA dehydrogenase, mitochondrial              | 0.79                 |
| P79303                      | PIG     | UTP--glucose-1-phosphate uridylyltransferase                                | 1.28                 |
| Q1KYT0                      | PIG     | Beta-enolase                                                                | 1.30                 |
| Q2HYU2                      | PIG     | 6-phosphofructokinase, muscle type                                          | 1.31                 |
| P12026                      | PIG     | Acyl-CoA-binding protein                                                    | 1.31                 |
| Q99028                      | PIG     | Catechol O-methyltransferase                                                | 1.35                 |
| P11217                      | HUMAN   | Glycogen phosphorylase, muscle form                                         | 1.35                 |
| P00355                      | PIG     | Glyceraldehyde-3-phosphate dehydrogenase                                    | 1.35                 |
| P12270                      | HUMAN   | Nucleoprotein TPR                                                           | 1.37                 |
| P13807                      | HUMAN   | Glycogen [starch] synthase, muscle                                          | 1.43                 |
| P06733                      | HUMAN   | Alpha-enolase                                                               | 1.46                 |
| P11021                      | HUMAN   | 78 kDa glucose-regulated protein                                            | 1.47                 |
| P07237                      | HUMAN   | Protein disulfide-isomerase                                                 | 1.63                 |
| Q8TDQ7                      | HUMAN   | Glucosamine-6-phosphate isomerase 2                                         | 1.65                 |
| Q8WNV7                      | PIG     | Dehydrogenase/reductase SDR family member 4                                 | 1.79                 |
| P51888                      | HUMAN   | Prolargin                                                                   | 1.91                 |
| P00339                      | PIG     | L-lactate dehydrogenase A chain                                             | 2.13                 |
| <b>Apoptosis and c</b> #N/A |         |                                                                             |                      |
| Q9GZU2                      | HUMAN   | Paternally-expressed gene 3 protein                                         | 0.70                 |
| O14737                      | HUMAN   | Programmed cell death protein 5                                             | 0.72                 |
| P30086                      | HUMAN   | Phosphatidylethanolamine-binding protein 1                                  | 0.74                 |
| P30048                      | HUMAN   | Thioredoxin-dependent peroxide reductase, mitochondrial                     | 0.75                 |
| O14497                      | HUMAN   | AT-rich interactive domain-containing protein 1A                            | 0.77                 |
| Q9UJH9                      | HUMAN   | SUN domain-containing protein 2                                             | 0.77                 |
| Q28943                      | PIG     | Dihydropyrimidine dehydrogenase [NADP+]                                     | 0.79                 |
| Q863Z0                      | PIG     | Proteasome activator complex subunit 2                                      | 0.79                 |
| P09913                      | HUMAN   | Interferon-induced protein with tetratricopeptide repeats 2                 | 1.26                 |
| P63104                      | HUMAN   | 14-3-3 protein zeta/delta                                                   | 1.27                 |
| Q04917                      | HUMAN   | 14-3-3 protein eta                                                          | 1.28                 |
| P18648                      | PIG     | Apolipoprotein A-I                                                          | 1.29                 |
| P30101                      | HUMAN   | Protein disulfide-isomerase A3                                              | 1.31                 |
| Q28938                      | PIG     | Interleukin-12 subunit beta                                                 | 1.32                 |
| Q2EN76                      | PIG     | Nucleoside diphosphate kinase B                                             | 1.33                 |
| P27797                      | HUMAN   | Calreticulin                                                                | 1.34                 |
| Q9NQC3                      | HUMAN   | Reticulon-4                                                                 | 1.37                 |
| P61981                      | HUMAN   | 14-3-3 protein gamma                                                        | 1.37                 |
| P27348                      | HUMAN   | 14-3-3 protein theta                                                        | 1.41                 |
| P52552                      | PIG     | Peroxiredoxin-2                                                             | 1.43                 |
| P03974                      | PIG     | Transitional endoplasmic reticulum ATPase                                   | 1.48                 |
| P80928                      | PIG     | Macrophage migration inhibitory factor                                      | 1.49                 |
| Q06830                      | HUMAN   | Peroxiredoxin-1                                                             | 1.52                 |
| P22314                      | HUMAN   | Ubiquitin-like modifier-activating enzyme 1                                 | 1.53                 |
| P08758                      | HUMAN   | Annexin A5                                                                  | 1.54                 |
| P19619                      | PIG     | Annexin A1                                                                  | 1.61                 |

|        |       |                                            |      |
|--------|-------|--------------------------------------------|------|
| P31946 | HUMAN | 14-3-3 protein beta/alpha                  | 1.62 |
| Q06323 | HUMAN | Proteasome activator complex subunit 1     | 1.62 |
| Q8MJ14 | PIG   | Glutathione peroxidase 1                   | 1.63 |
| Q01995 | HUMAN | Transgelin                                 | 1.75 |
| P00795 | PIG   | Cathepsin D                                | 1.77 |
| P19620 | PIG   | Annexin A2                                 | 1.77 |
| P82460 | PIG   | Thioredoxin                                | 1.81 |
| P37802 | HUMAN | Transgelin-2                               | 1.81 |
| Q865U8 | PIG   | Ankyrin repeat domain-containing protein 1 | 1.86 |
| P62936 | PIG   | Peptidyl-prolyl cis-trans isomerase A      | 2.26 |
| Q7M2W6 | PIG   | Alpha-crystallin B chain                   | 2.28 |
| P52701 | HUMAN | DNA mismatch repair protein Msh6           | 2.64 |
| Q9GKQ6 | PIG   | Biglycan                                   | 2.90 |

### Organization of #N/A

|        |       |                                             |      |
|--------|-------|---------------------------------------------|------|
| O15144 | HUMAN | Actin-related protein 2/3 complex subunit 2 | 0.57 |
| Q03001 | HUMAN | Bullous pemphigoid antigen 1                | 0.67 |
| Q96PY5 | HUMAN | Formin-like protein 2                       | 0.68 |
| P04264 | HUMAN | Keratin, type II cytoskeletal 1             | 0.71 |
| A4D2P6 | HUMAN | Delphinin                                   | 0.73 |
| Q9NYB9 | HUMAN | Abl interactor 2                            | 0.75 |
| P55290 | HUMAN | Cadherin-13                                 | 0.78 |
| Q43379 | HUMAN | WD repeat-containing protein 62             | 1.26 |
| P68032 | HUMAN | Actin, alpha cardiac muscle 1               | 1.26 |
| P15924 | HUMAN | Desmoplakin                                 | 1.26 |
| Q15404 | HUMAN | Ras suppressor protein 1                    | 1.27 |
| P51148 | HUMAN | Ras-related protein Rab-5C                  | 1.27 |
| P07737 | HUMAN | Profilin-1                                  | 1.28 |
| P26234 | PIG   | Vinculin                                    | 1.28 |
| Q9Y490 | HUMAN | Talin-1                                     | 1.28 |
| Q9Y281 | HUMAN | Cofilin-2                                   | 1.30 |
| Q6KB66 | HUMAN | Keratin, type II cytoskeletal 80            | 1.30 |
| Q9NY65 | HUMAN | Tubulin alpha-8 chain                       | 1.33 |
| Q16555 | HUMAN | Dihydropyrimidinase-related protein 2       | 1.34 |
| Q43707 | HUMAN | Alpha-actinin-4                             | 1.36 |
| P61019 | HUMAN | Ras-related protein Rab-2A                  | 1.40 |
| Q75083 | HUMAN | WD repeat-containing protein 1              | 1.49 |
| P21333 | HUMAN | Filamin-A                                   | 1.49 |
| Q05682 | HUMAN | Caldesmon                                   | 1.51 |
| P61160 | HUMAN | Actin-related protein 2                     | 1.54 |
| Q92974 | HUMAN | Rho guanine nucleotide exchange factor 2    | 1.60 |
| Q14195 | HUMAN | Dihydropyrimidinase-related protein 3       | 1.60 |
| P35241 | HUMAN | Radixin                                     | 1.62 |
| P61026 | HUMAN | Ras-related protein Rab-10                  | 1.63 |
| P68371 | HUMAN | Tubulin beta-2C chain                       | 1.64 |
| P07437 | HUMAN | Tubulin beta chain                          | 1.66 |
| P23528 | HUMAN | Cofilin-1                                   | 1.68 |
| Q14315 | HUMAN | Filamin-C                                   | 1.69 |
| P02540 | PIG   | Desmin                                      | 1.76 |
| P20305 | PIG   | Gelsolin                                    | 1.84 |
| P68366 | HUMAN | Tubulin alpha-4A chain                      | 1.94 |
| P08670 | HUMAN | Vimentin                                    | 1.96 |
| Q9BQE3 | HUMAN | Tubulin alpha-1C chain                      | 2.00 |
| P68363 | HUMAN | Tubulin alpha-1B chain                      | 2.07 |
| P13796 | HUMAN | Plastin-2                                   | 3.32 |

### Transcription an #N/A

|        |       |                                                             |      |
|--------|-------|-------------------------------------------------------------|------|
| Q71F56 | HUMAN | Mediator of RNA polymerase II transcription subunit 13-like | 0.60 |
| P62263 | HUMAN | 40S ribosomal protein S14                                   | 0.60 |
| Q75150 | HUMAN | E3 ubiquitin-protein ligase BRE1B                           | 0.67 |
| P23588 | HUMAN | Eukaryotic translation initiation factor 4B                 | 0.70 |
| Q7Z478 | HUMAN | ATP-dependent RNA helicase DHX29                            | 0.75 |
| Q96G01 | HUMAN | Protein bicaudal D homolog 1                                | 0.76 |
| P23396 | HUMAN | 40S ribosomal protein S3                                    | 1.26 |
| P62805 | HUMAN | Histone H4                                                  | 1.29 |
| Q05639 | HUMAN | Elongation factor 1-alpha 2                                 | 1.32 |
| Q14240 | HUMAN | Eukaryotic initiation factor 4A-II                          | 1.34 |
| P13639 | HUMAN | Elongation factor 2                                         | 1.35 |
| Q9BXX3 | HUMAN | Ankyrin repeat domain-containing protein 30A                | 1.42 |
| Q9C0F0 | HUMAN | Putative Polycomb group protein ASXL3                       | 1.43 |

|                           |             |                                                                           |      |
|---------------------------|-------------|---------------------------------------------------------------------------|------|
| P29692                    | HUMAN       | Elongation factor 1-delta                                                 | 1.46 |
| P22626                    | HUMAN       | Heterogeneous nuclear ribonucleoproteins A2/B1                            | 1.48 |
| P62701                    | HUMAN       | 40S ribosomal protein S4, X isoform                                       | 1.48 |
| P16402                    | HUMAN       | Histone H1.3                                                              | 1.49 |
| P24534                    | HUMAN       | Elongation factor 1-beta                                                  | 1.50 |
| Q5VTE0                    | HUMAN       | Putative elongation factor 1-alpha-like 3                                 | 1.51 |
| P08865                    | HUMAN       | 40S ribosomal protein SA                                                  | 1.52 |
| P61978                    | HUMAN       | Heterogeneous nuclear ribonucleoprotein K                                 | 1.60 |
| Q9UKV0                    | HUMAN       | Histone deacetylase 9                                                     | 1.68 |
| P26641                    | HUMAN       | Elongation factor 1-gamma                                                 | 1.69 |
| Q29315                    | PIG         | 60S acidic ribosomal protein P2                                           | 1.74 |
| Q96SB4                    | HUMAN       | Serine/threonine-protein kinase SRPK1                                     | 1.79 |
| <b>Protein processi</b>   | <b>#N/A</b> |                                                                           |      |
| Q01955                    | HUMAN       | Collagen alpha-3(IV) chain                                                | 0.63 |
| A6NNM8                    | HUMAN       | Tubulin polyglutamylase TTLL13                                            | 0.72 |
| Q9Y5W8                    | HUMAN       | Sorting nexin-13                                                          | 0.72 |
| O60449                    | HUMAN       | Lymphocyte antigen 75                                                     | 0.75 |
| Q8TDW5                    | HUMAN       | Synaptotagmin-like protein 5                                              | 0.77 |
| Q7Z7G8                    | HUMAN       | Vacuolar protein sorting-associated protein 13B                           | 0.79 |
| P12111                    | HUMAN       | Collagen alpha-3(VI) chain                                                | 0.80 |
| P53675                    | HUMAN       | Clathrin heavy chain 2                                                    | 1.27 |
| Q15366                    | HUMAN       | Poly(rC)-binding protein 2                                                | 1.30 |
| Q9HAV4                    | HUMAN       | Exportin-5                                                                | 1.33 |
| Q9NZN4                    | HUMAN       | EH domain-containing protein 2                                            | 1.34 |
| Q00610                    | HUMAN       | Clathrin heavy chain 1                                                    | 1.34 |
| Q00688                    | HUMAN       | Peptidyl-prolyl cis-trans isomerase FKBP3                                 | 1.39 |
| Q96RL7                    | HUMAN       | Vacuolar protein sorting-associated protein 13A                           | 1.51 |
| Q09161                    | HUMAN       | Nuclear cap-binding protein subunit 1                                     | 1.55 |
| Q9NZ52                    | HUMAN       | ADP-ribosylation factor-binding protein GGA3                              | 1.68 |
| Q15365                    | HUMAN       | Poly(rC)-binding protein 1                                                | 1.68 |
| Q76N89                    | HUMAN       | E3 ubiquitin-protein ligase HECW1                                         | 1.77 |
| <b>Cell differentiati</b> | <b>#N/A</b> |                                                                           |      |
| Q9NX45                    | HUMAN       | Spermatogenesis- and oogenesis-specific basic helix-loop-helix-containing | 0.77 |
| Q702N8                    | HUMAN       | Xin actin-binding repeat-containing protein 1                             | 1.33 |
| O94875                    | HUMAN       | Sorbin and SH3 domain-containing protein 2                                | 1.33 |
| Q13642                    | HUMAN       | Four and a half LIM domains protein 1                                     | 1.36 |
| Q5VZE5                    | HUMAN       | N-alpha-acetyltransferase 35, NatC auxiliary subunit                      | 1.39 |
| Q5FZP5                    | PIG         | Secretogranin-2                                                           | 1.54 |
| P50461                    | HUMAN       | Cysteine and glycine-rich protein 3                                       | 1.66 |
| <b>Muscle Contract</b>    | <b>#N/A</b> |                                                                           |      |
| Q5VTT5                    | HUMAN       | Myomesin-3                                                                | 0.71 |
| Q9P2P6                    | HUMAN       | StAR-related lipid transfer protein 9                                     | 0.73 |
| Q8WXX0                    | HUMAN       | Dynein heavy chain 7, axonemal                                            | 0.74 |
| P45379                    | HUMAN       | Troponin T, cardiac muscle                                                | 0.75 |
| P54296                    | HUMAN       | Myomesin-2                                                                | 0.75 |
| Q9UM54                    | HUMAN       | Myosin-VI                                                                 | 0.76 |
| Q8IVF4                    | HUMAN       | Dynein heavy chain 10, axonemal                                           | 0.77 |
| P08590                    | HUMAN       | Myosin light chain 3                                                      | 0.77 |
| Q14896                    | HUMAN       | Myosin-binding protein C, cardiac-type                                    | 0.78 |
| Q9NPC6                    | HUMAN       | Myozenin-2                                                                | 0.79 |
| P13535                    | HUMAN       | Myosin-8                                                                  | 0.80 |
| P52179                    | HUMAN       | Myomesin-1                                                                | 0.80 |
| P33176                    | HUMAN       | Kinesin-1 heavy chain                                                     | 1.29 |
| Q13136                    | HUMAN       | Liprin-alpha-1                                                            | 1.35 |
| P19105                    | HUMAN       | Myosin regulatory light chain 12A                                         | 1.36 |
| P35580                    | HUMAN       | Myosin-10                                                                 | 1.38 |
| P35749                    | HUMAN       | Myosin-11                                                                 | 1.41 |
| Q86UP2                    | HUMAN       | Kinectin                                                                  | 1.47 |
| P26038                    | HUMAN       | Moesin                                                                    | 1.52 |
| Q9P2D7                    | HUMAN       | Dynein heavy chain 1, axonemal                                            | 1.71 |
| <b>ion transport(6)</b>   | <b>#N/A</b> |                                                                           |      |
| P11607                    | PIG         | Sarcoplasmic/endoplasmic reticulum calcium ATPase 2                       | 0.72 |
| Q00975                    | HUMAN       | Voltage-dependent N-type calcium channel subunit alpha-1B                 | 0.72 |
| Q5VU97                    | HUMAN       | VWFA and cache domain-containing protein 1                                | 0.78 |
| Q15413                    | HUMAN       | Ryanodine receptor 3                                                      | 0.79 |
| O00299                    | HUMAN       | Chloride intracellular channel protein 1                                  | 1.48 |
| Q9BXN1                    | HUMAN       | Asporin                                                                   | 1.59 |



|                         |       |      |                                                   |      |
|-------------------------|-------|------|---------------------------------------------------|------|
| <b>Heatshock prote</b>  |       | #N/A |                                                   |      |
| Q9UBY9                  | HUMAN |      | Heat shock protein beta-7                         | 1.28 |
| Q12931                  | HUMAN |      | Heat shock protein 75 kDa, mitochondrial          | 1.33 |
| P11142                  | HUMAN |      | Heat shock cognate 71 kDa protein                 | 1.38 |
| Q5S1U1                  | PIG   |      | Heat shock protein beta-1                         | 1.54 |
| O14558                  | HUMAN |      | Heat shock protein beta-6                         | 1.54 |
| Q16082                  | HUMAN |      | Heat shock protein beta-2                         | 1.61 |
| O02705                  | PIG   |      | Heat shock protein HSP 90-alpha                   | 1.62 |
| P08238                  | HUMAN |      | Heat shock protein HSP 90-beta                    | 1.66 |
| Q6S4N2                  | PIG   |      | Heat shock 70 kDa protein 1B                      | 1.67 |
| <b>Signal transduct</b> |       | #N/A |                                                   |      |
| Q9P219                  | HUMAN |      | Protein Daple                                     | 0.70 |
| Q9NYQ7                  | HUMAN |      | Cadherin EGF LAG seven-pass G-type receptor 3     | 0.71 |
| Q86VI3                  | HUMAN |      | Ras GTPase-activating-like protein IQGAP3         | 0.72 |
| P55196                  | HUMAN |      | Afadin                                            | 0.79 |
| Q86SQ0                  | HUMAN |      | Pleckstrin homology-like domain family B member 2 | 1.26 |
| Q8IZF6                  | HUMAN |      | Probable G-protein coupled receptor 112           | 1.32 |
| Q9H082                  | HUMAN |      | Ras-related protein Rab-33B                       | 1.53 |
| Q6VAB6                  | HUMAN |      | Kinase suppressor of Ras 2                        | 0.56 |
| <b>N/A(18)</b>          |       | #N/A |                                                   |      |
| Q8TC29                  | HUMAN |      | Enkurin                                           | 0.57 |
| Q92804                  | HUMAN |      | TATA-binding protein-associated factor 2N         | 0.65 |
| Q9Y6X0                  | HUMAN |      | SET-binding protein                               | 0.67 |
| Q6ZMN7                  | HUMAN |      | PDZ domain-containing RING finger protein 4       | 0.71 |
| Q9P203                  | HUMAN |      | BTB/POZ domain-containing protein 7               | 0.72 |
| Q4G0P3                  | HUMAN |      | Hydrocephalus-inducing protein homolog            | 0.77 |
| A1XQR7                  | PIG   |      | Protein QIL1                                      | 0.78 |
| Q5PXT2                  | PIG   |      | LIM and cysteine-rich domains protein 1           | 0.80 |
| Q5K651                  | HUMAN |      | Sterile alpha motif domain-containing protein 9   | 1.25 |
| Q8NBF2                  | HUMAN |      | NHL repeat-containing protein 2                   | 1.27 |
| Q5JV73                  | HUMAN |      | FERM and PDZ domain-containing protein 3          | 1.28 |
| O95810                  | HUMAN |      | Serum deprivation-response protein                | 1.28 |
| Q8NEF3                  | HUMAN |      | Coiled-coil domain-containing protein 112         | 1.31 |
| A6QL64                  | HUMAN |      | Ankyrin repeat domain-containing protein 36A      | 1.33 |
| Q9H987                  | HUMAN |      | Synaptopodin 2-like protein                       | 1.36 |
| Q9NR30                  | HUMAN |      | Nucleolar RNA helicase 2                          | 1.37 |
| P0C881                  | HUMAN |      | Radial spoke head 10 homolog B                    | 1.41 |
| Q86VV8                  | HUMAN |      | Rotatin                                           | 1.48 |
